# Supplementary material for: Iodine catalyzed synthesis of imidazo[1,2- a ]pyrazine and imidazo[1,2- a ]pyridine derivatives and their anticancer activity
Source: Royal Society of Chemistry journal article supplement (doi:10.1039/d3ra07842f), 2023-01-01
Supplement: d3ra07842f1.pdf [file d3ra07842f1.pdf]

## **Iodine Catalyzed Synthesis of Imidazo[1,2-*a*]Pyrazine and Imidazo[1,2-*a*]Pyridine Derivatives and their Anticancer activity**

Rajavenkatesh Krishnamoorthy\*<sup>a</sup>, Parthiban Anaikutti\*<sup>b</sup>

<sup>a</sup>Organic and Bioorganic Chemistry Laboratory, CSIR-Central Leather Research Institute (CSIR- CLRI), Adyar, Chennai, Tamil Nadu, - 600020, India.

<sup>b</sup>Centre for GMP, National Institute of Pharmaceutical Education and Research (NIPER-G), Guwahati, Assam- 781101, India.

### **Corresponding authors**

Dr. A. PARTHIBAN

Centre for GMP

National Institute of Pharmaceutical Education and Research, Guwahati

Assam. Mobile: +91- 9843080794

Email: [parthichem84@gmail.com](mailto:parthichem84@gmail.com)

[parthiban@niperguwahati.in](mailto:parthiban@niperguwahati.in)

Dr. K. RAJAVENKATESH

Organic and Bioorganic Chemistry Laboratory,

CSIR-CLRI,

Adyar, Chennai-600020, Tamilnadu, India.

Email: [krajavenkateshcmp5@gmail.com](mailto:krajavenkateshcmp5@gmail.com) /[rajavenkateshk2@gmail.com](mailto:rajavenkateshk2@gmail.com)

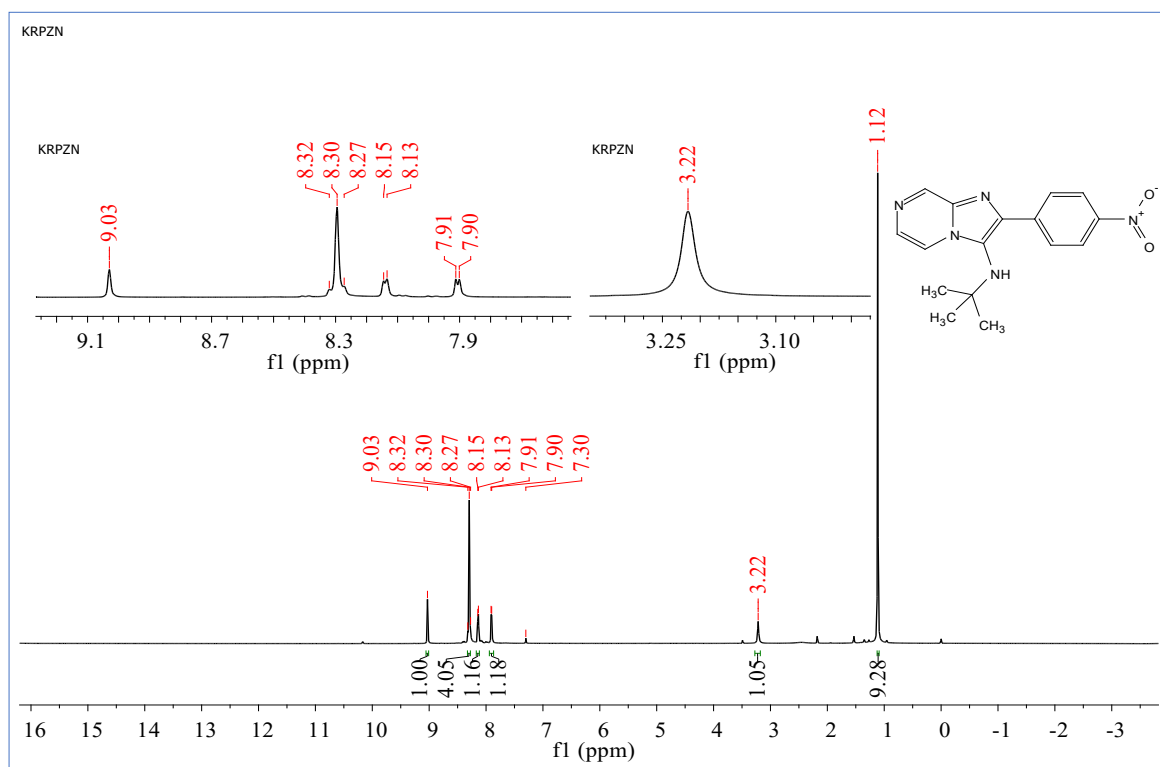

**Supplementary Fig. 1** 400 MHz (CDCl<sub>3</sub>) <sup>1</sup>H NMR spectrum of N-(tert-butyl)-2-(4-nitrophenyl)imidazo[1,2-a]pyrazin-3-amine (10a).

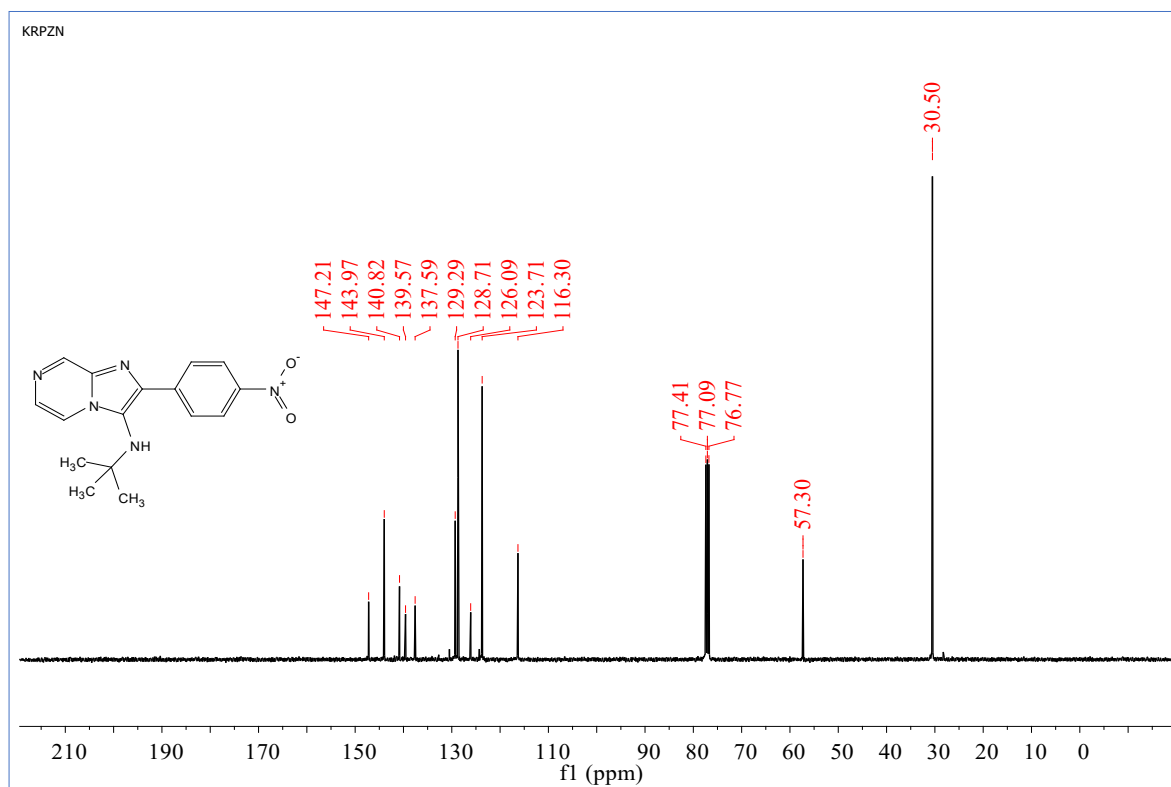

**Supplementary Fig. 2** 100 MHz (CDCl<sub>3</sub>) <sup>13</sup>C NMR spectrum of N-(tert-butyl)-2-(4-nitrophenyl)imidazo[1,2-a]pyrazin-3-amine (10a).

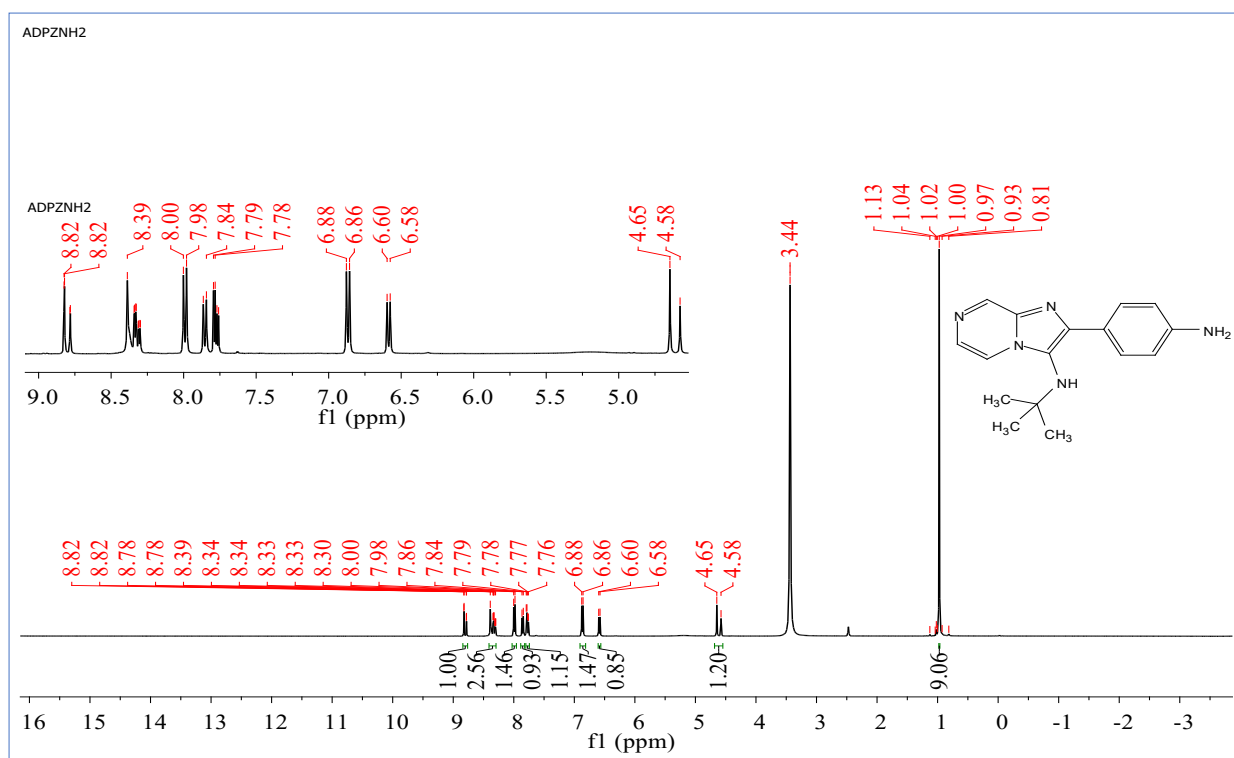

**Supplementary Fig. 3** 400 MHz (DMSO-d<sub>6</sub>) <sup>1</sup>H NMR spectrum of 2-(4-aminophenyl)-N-(tert-butyl)imidazo[1,2-a]pyrazin-3-amine (**10b**).

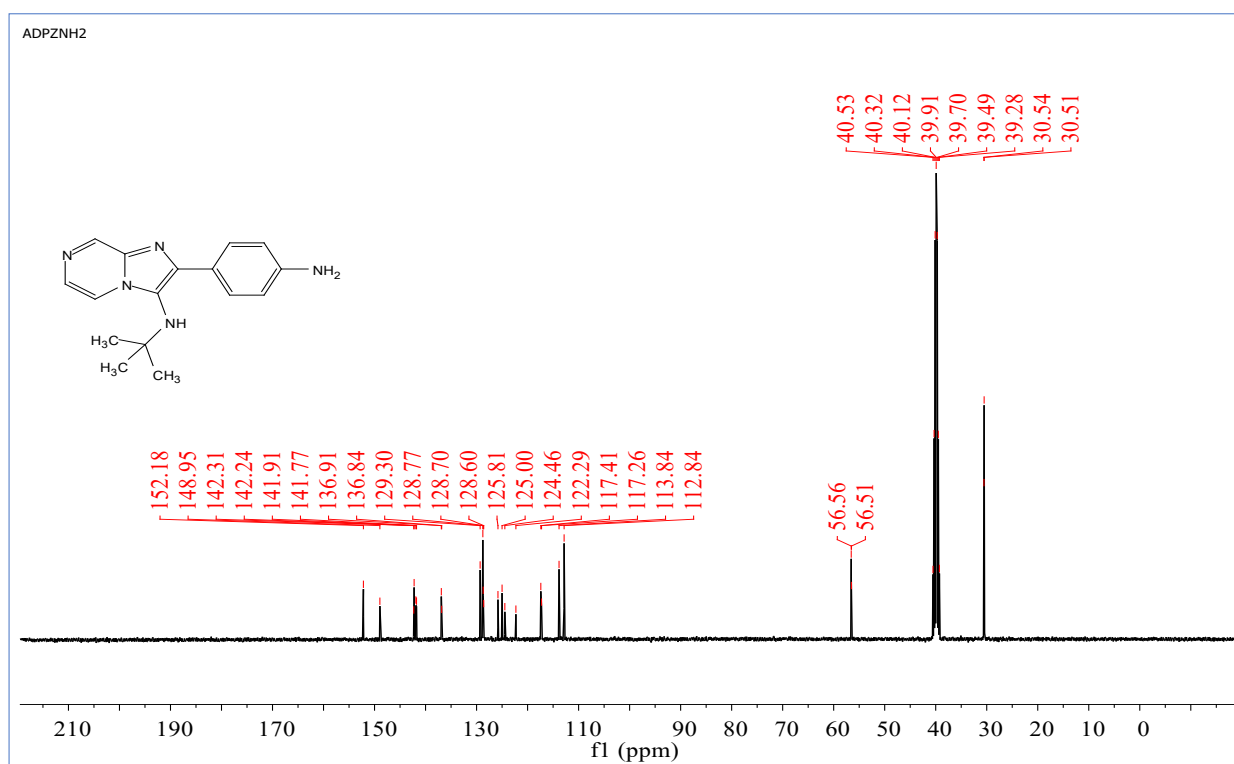

**Supplementary Fig. 4** 100 MHz (DMSO-d<sub>6</sub>) <sup>13</sup>C NMR spectrum of 2-(4-aminophenyl)-N-(tert-butyl)imidazo[1,2-a]pyrazin-3-amine (**10b**).



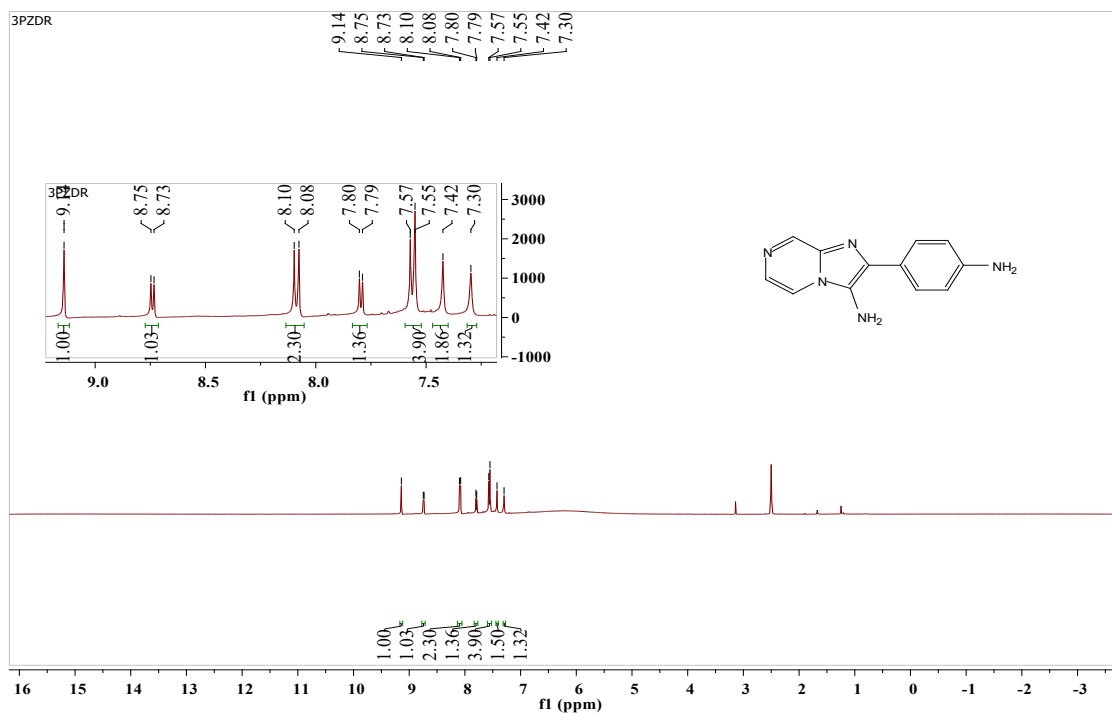

Sup

plementary Fig. 7 400 MHz (DMSO-d<sub>6</sub>) <sup>1</sup>H NMR spectrum of 2-(4-aminophenyl)imidazo[1,2-a]pyrazin-3-amine (10d).

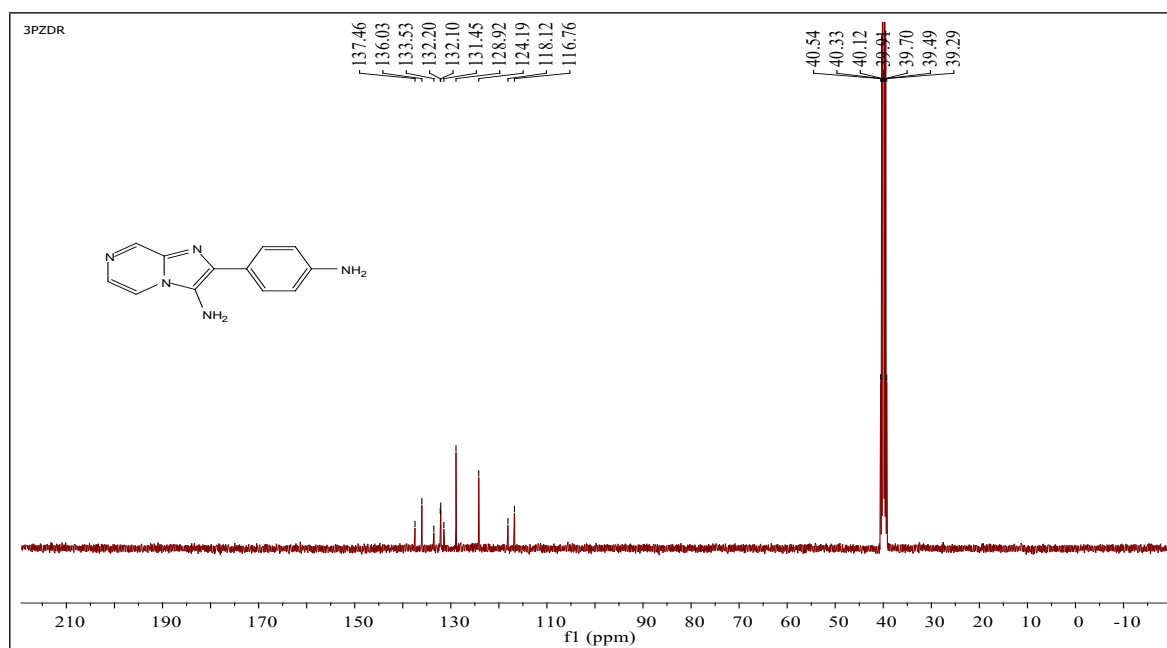

Supplementary Fig. 8 100 MHz (DMSO-d<sub>6</sub>) <sup>13</sup>C NMR spectrum of 2-(4-aminophenyl)imidazo[1,2-a]pyrazin-3-amine (10d).



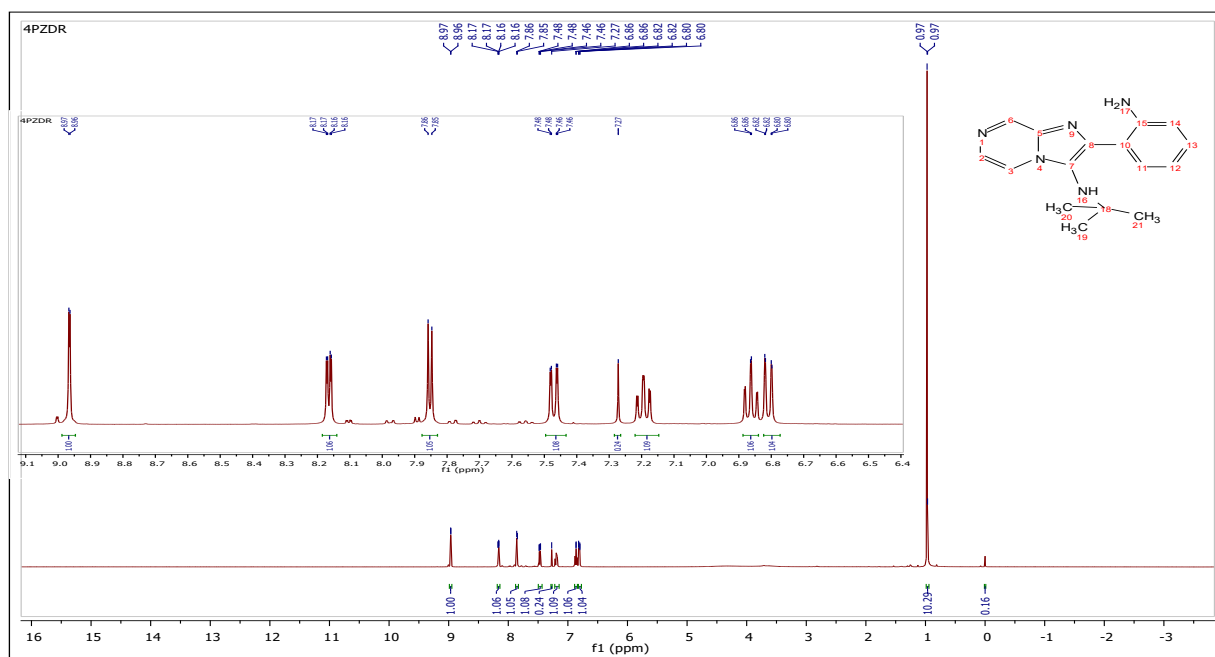

**Supplementary Fig. 11** 400 MHz ( $\text{CDCl}_3$ )  $^1\text{H}$  NMR spectrum of 2-(2-aminophenyl)-N-(tert-butyl)imidazo[1,2-a]pyrazin-3-amine (10f).

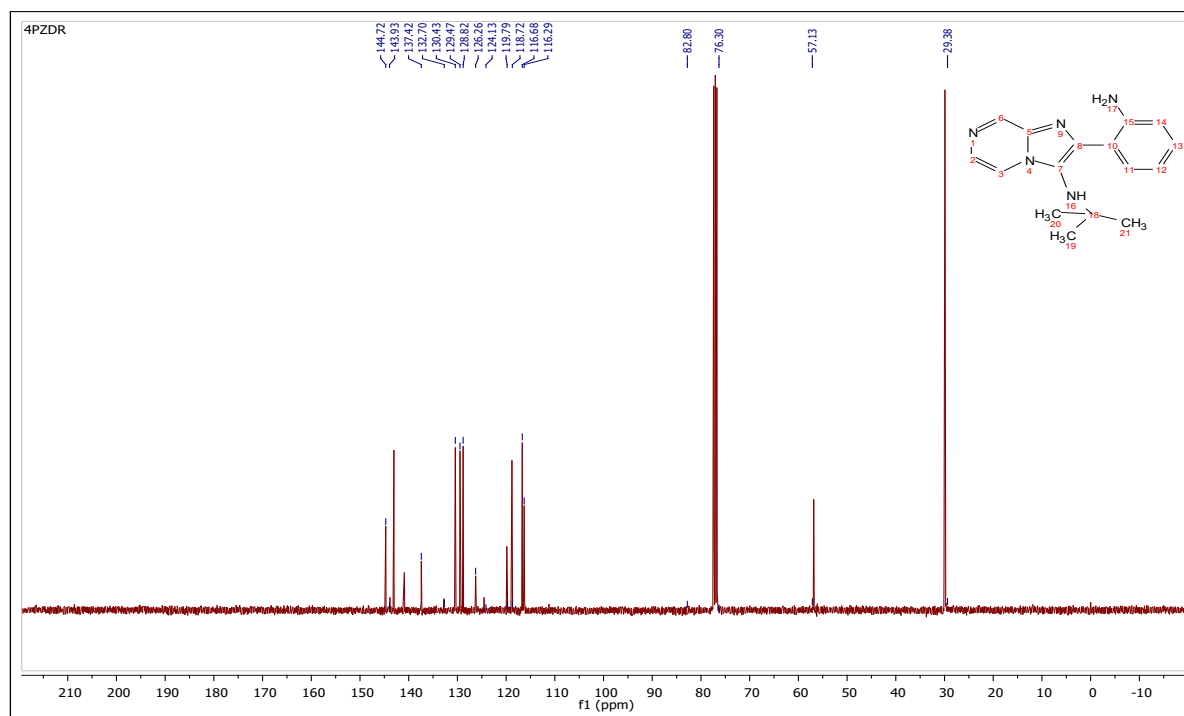

**Supplementary Fig. 12** 100 MHz ( $\text{CDCl}_3$ )  $^{13}\text{C}$  NMR spectrum of 2-(2-aminophenyl)-N-(tert-butyl)imidazo[1,2-a]pyrazin-3-amine (10f).

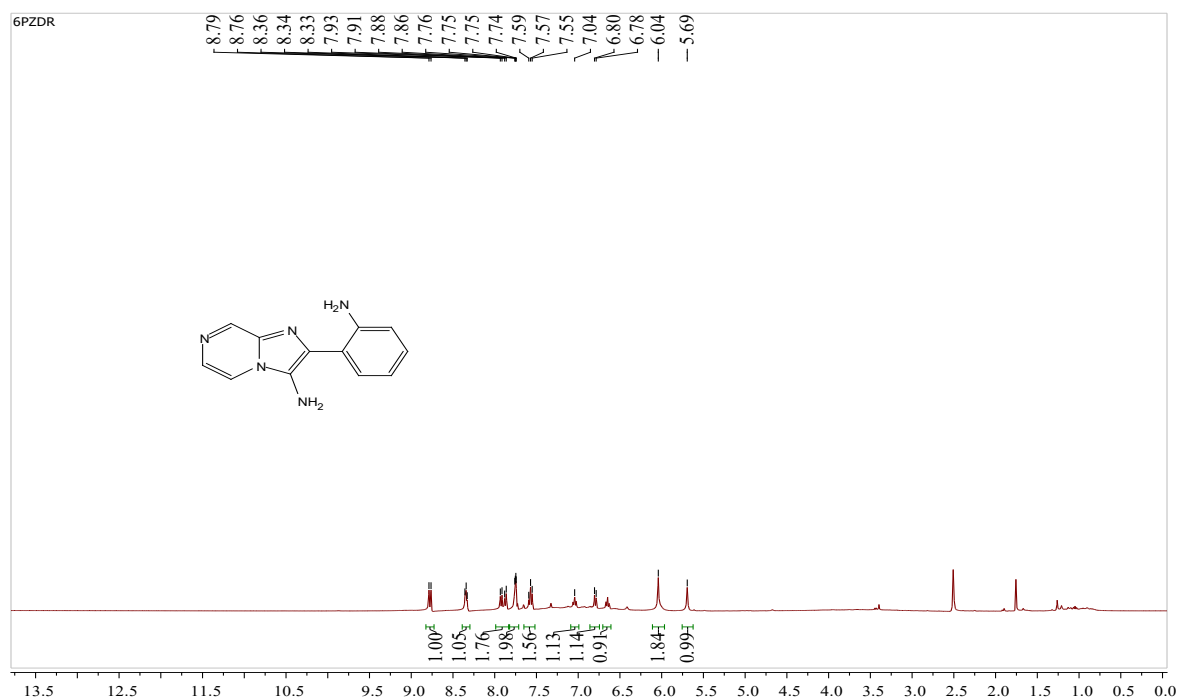

Supplementary Fig. 13 400 MHz (DMSO-d<sub>6</sub>) <sup>1</sup>H NMR spectrum of 2-(2-aminophenyl)imidazo[1,2-a]pyrazin-3-amine (10g).

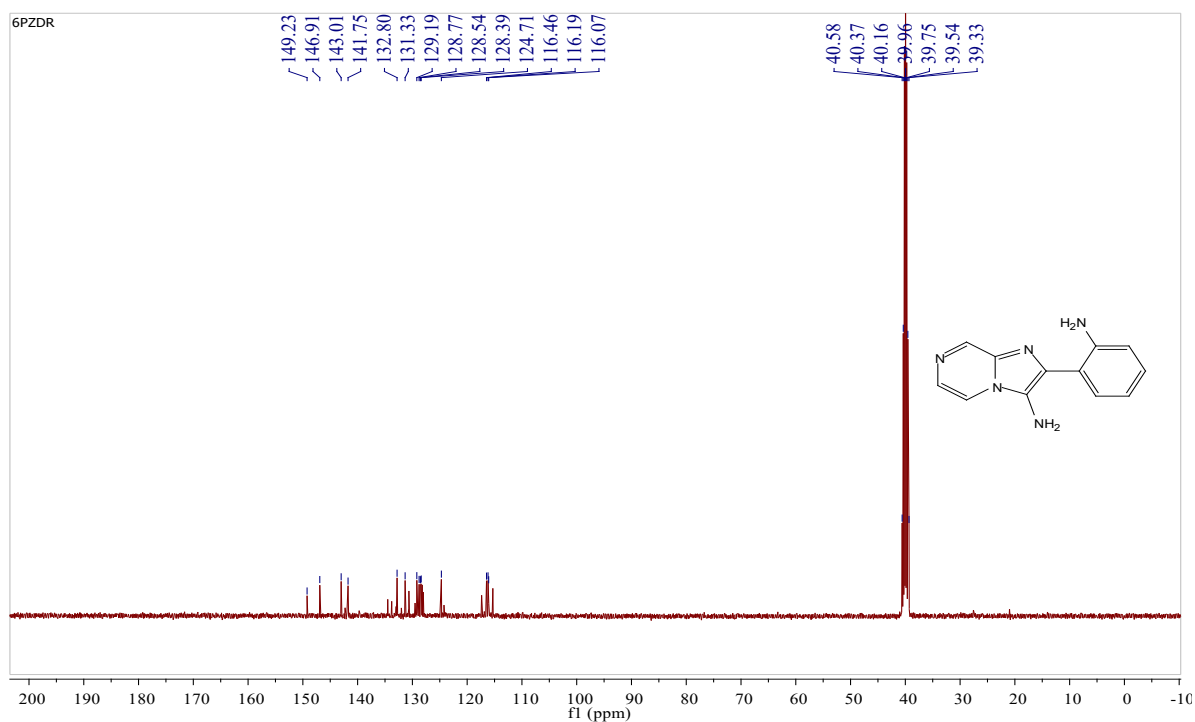

Supplementary Fig. 14 100 MHz (DMSO-d<sub>6</sub>) <sup>13</sup>C NMR spectrum of 2-(2-aminophenyl)imidazo[1,2-a]pyrazin-3-amine (10g).



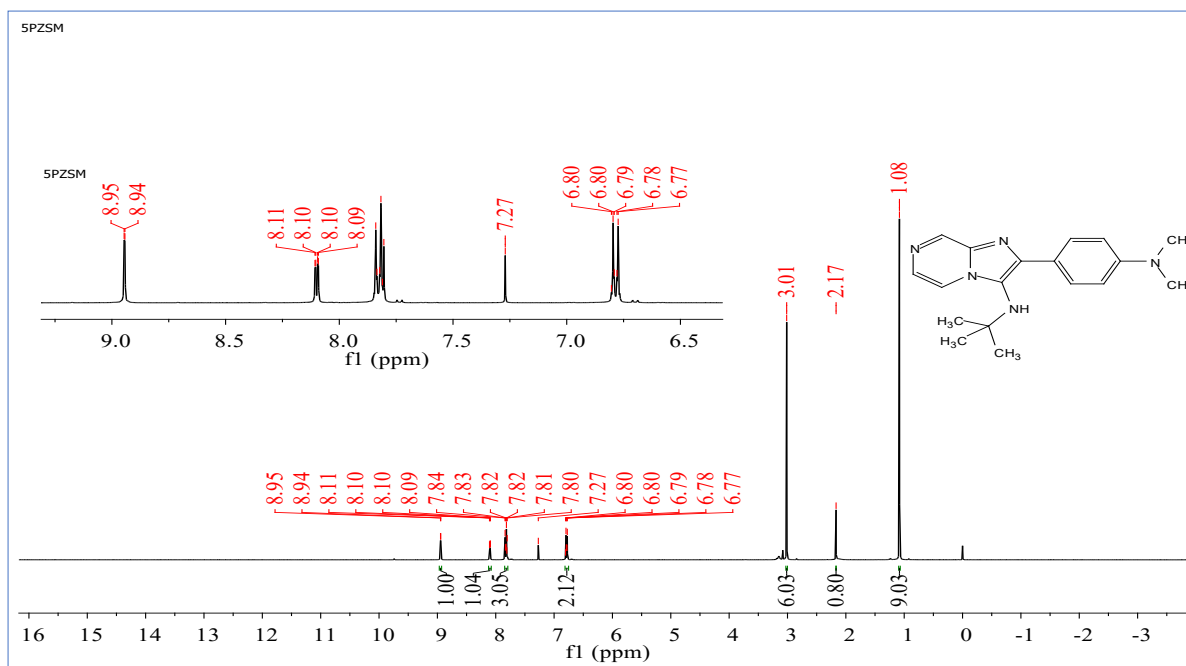

**Supplementary Fig. 15** 400 MHz (CDCl<sub>3</sub>) <sup>1</sup>H NMR spectrum of N-(tert-butyl)-2-(4-(dimethylamino)phenyl)imidazo[1,2-a]pyrazin-3-amine (10h).

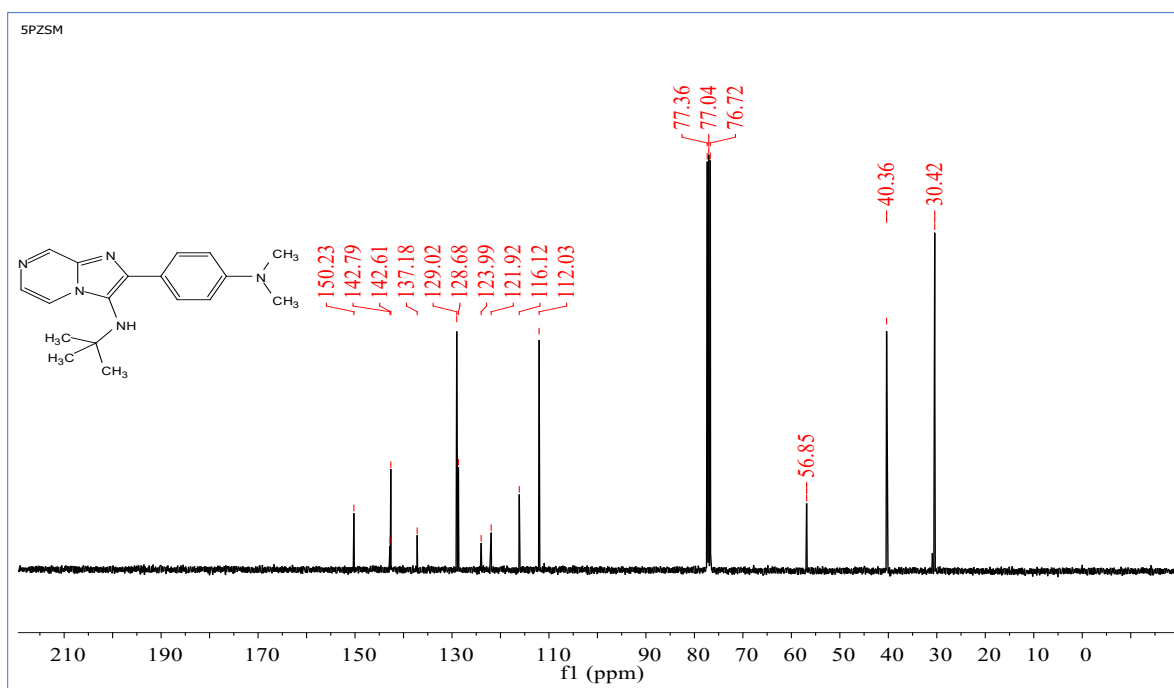

**Supplementary Fig. 16** 100 MHz (CDCl<sub>3</sub>) <sup>13</sup>C NMR spectrum of N-(tert-butyl)-2-(4-(dimethylamino)phenyl)imidazo[1,2-a]pyrazin-3-amine (10h).

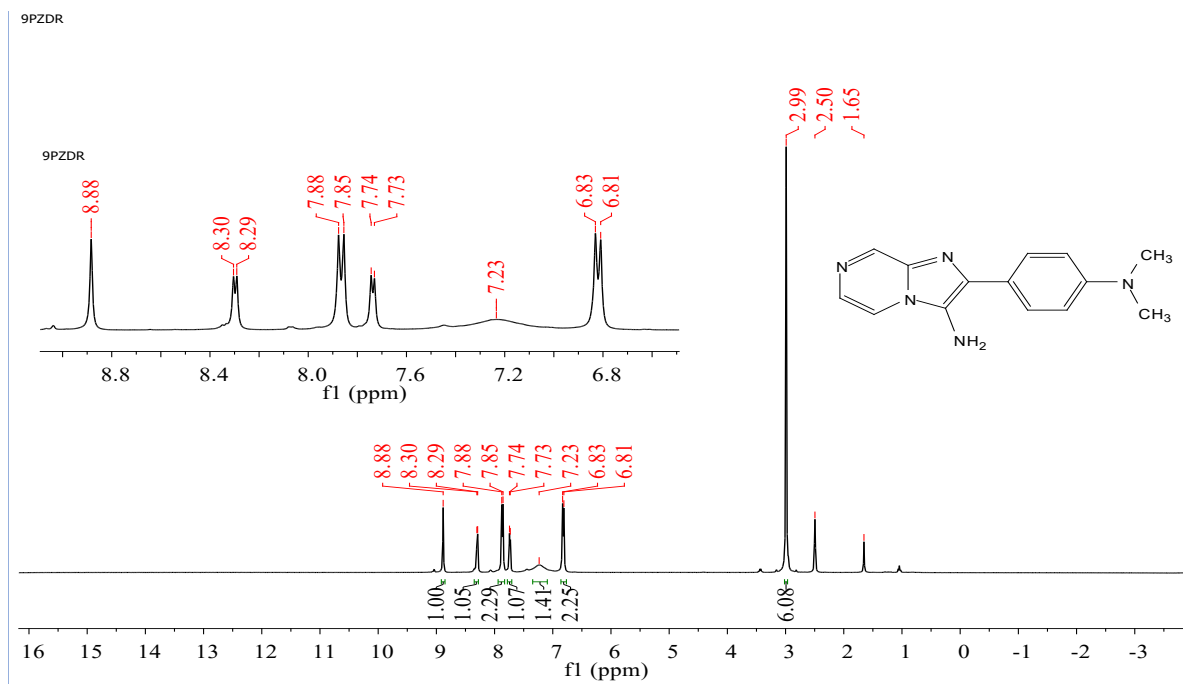

**Supplementary Fig. 17** 400 MHz (DMSO- $d_6$ )  $^1\text{H}$  NMR spectrum of 2-(4-(dimethylamino)phenyl)imidazo[1,2-a]pyrazin-3-amine (10i).

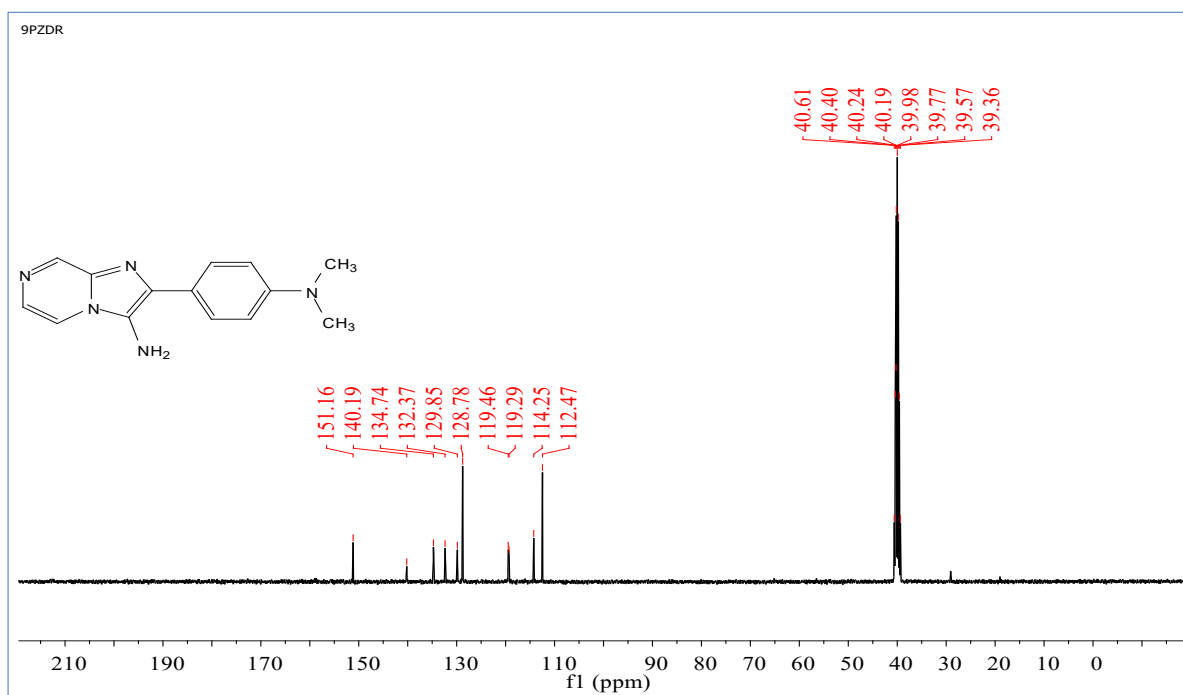

**Supplementary Fig. 18** 100 MHz (DMSO- $d_6$ )  $^{13}\text{C}$  NMR spectrum of 2-(4-(dimethylamino)phenyl)imidazo[1,2-a]pyrazin-3-amine (10i).

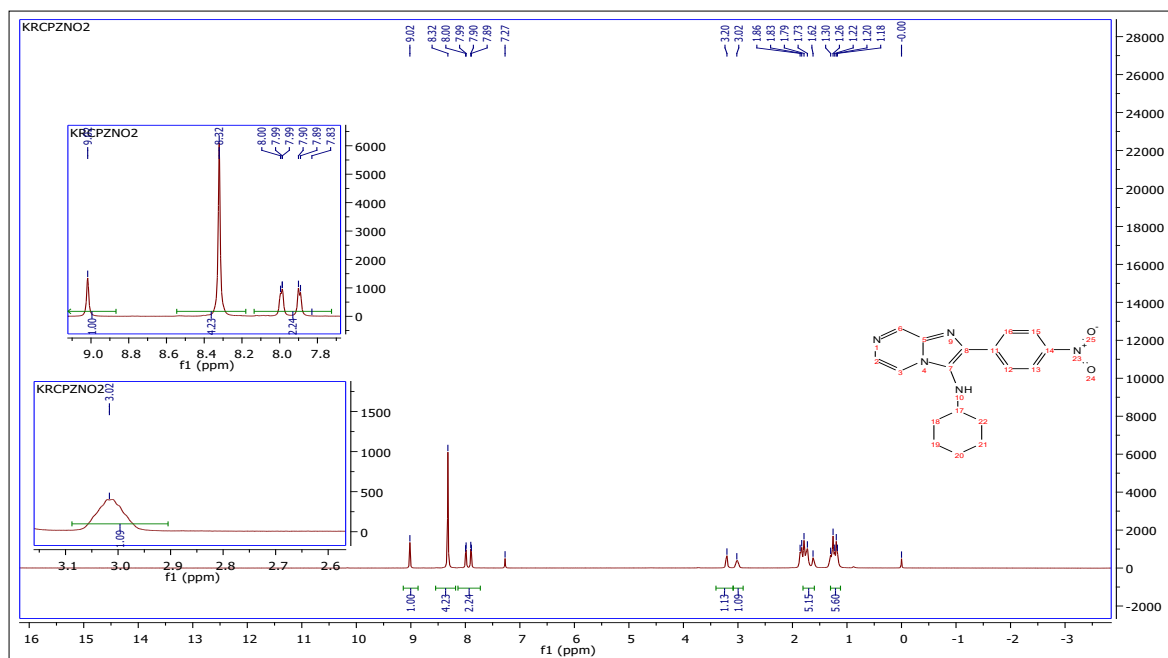

Supplementary Fig. 19 400 MHz (CDCl<sub>3</sub>) <sup>1</sup>H NMR spectrum of N-cyclohexyl-2-(4-nitrophenyl)imidazo[1,2-a]pyrazin-3-amine (10j).

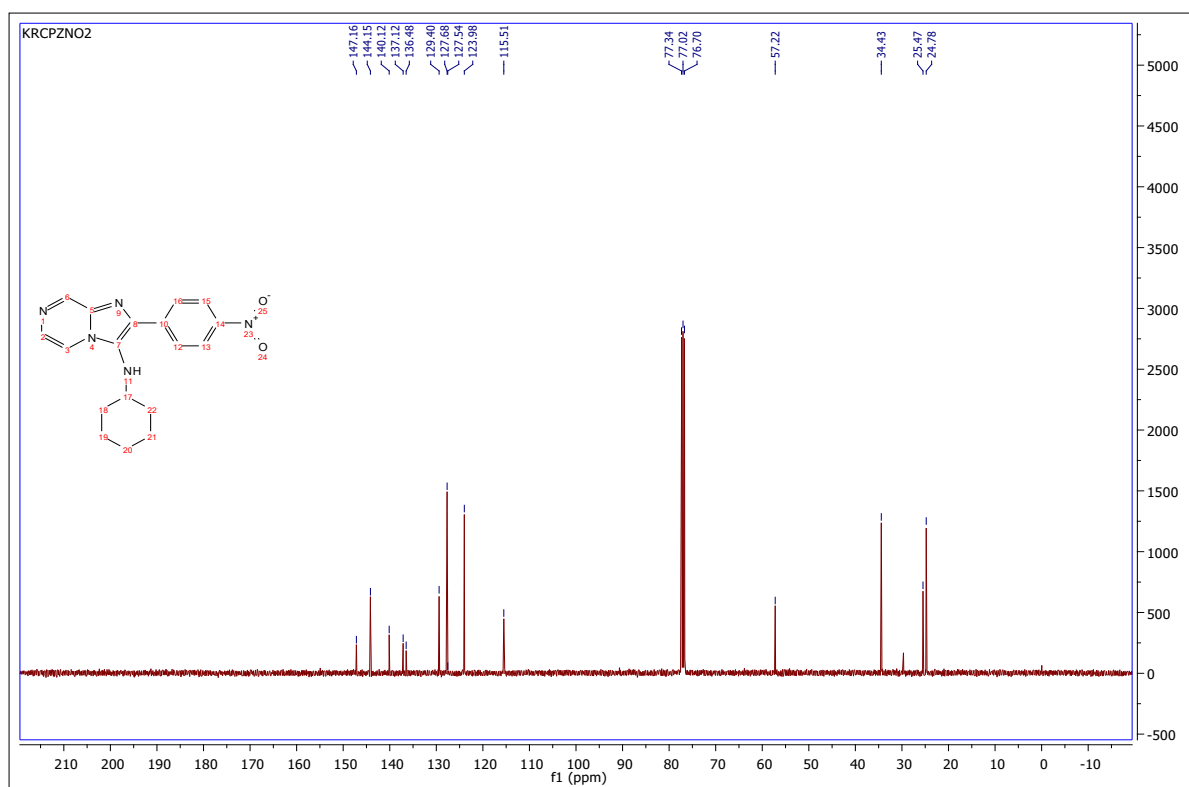

Supplementary Fig. 20 100 MHz (CDCl<sub>3</sub>) <sup>13</sup>C NMR spectrum of N-cyclohexyl-2-(4-nitrophenyl)imidazo[1,2-a]pyrazin-3-amine (10j).

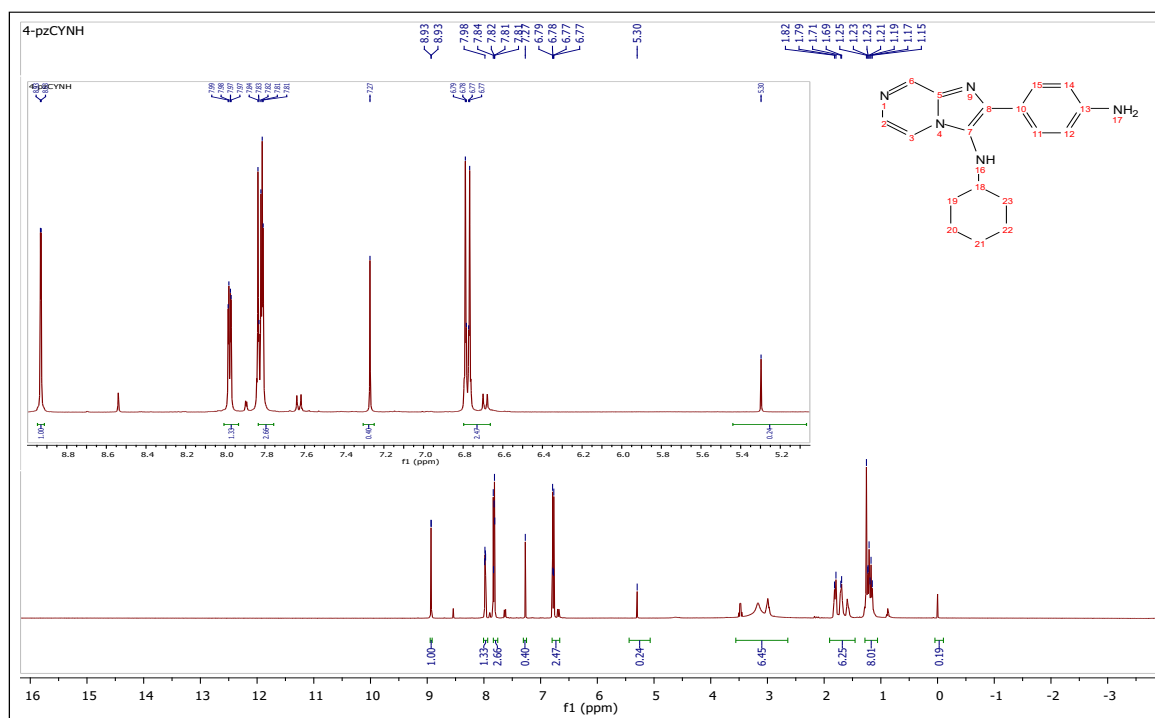

Supplementary Fig. 21 400 MHz (CDCl<sub>3</sub>) <sup>1</sup>H NMR spectrum of 2-(4-aminophenyl)-N-cyclohexylimidazo[1,2-a]pyrazin-3-amine (10k).

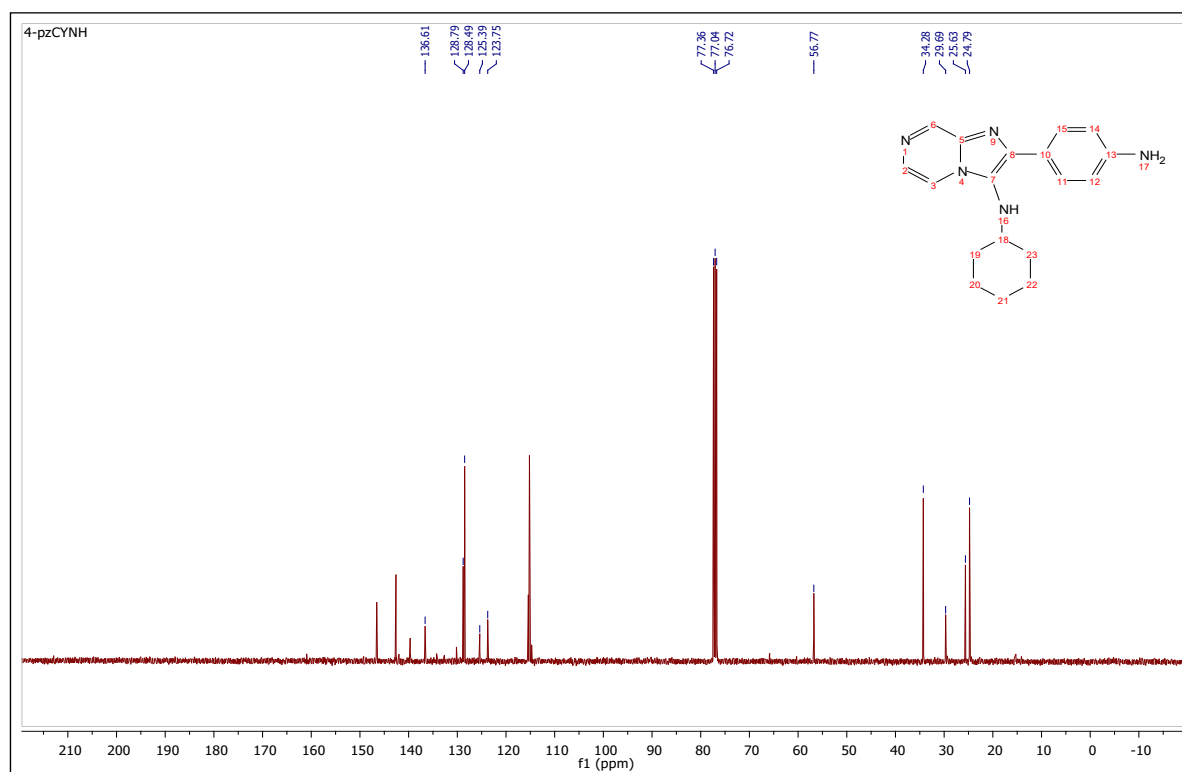

Supplementary Fig. 22 100 MHz (CDCl<sub>3</sub>) <sup>13</sup>C NMR spectrum of 2-(4-aminophenyl)-N-cyclohexylimidazo[1,2-a]pyrazin-3-amine (10k).

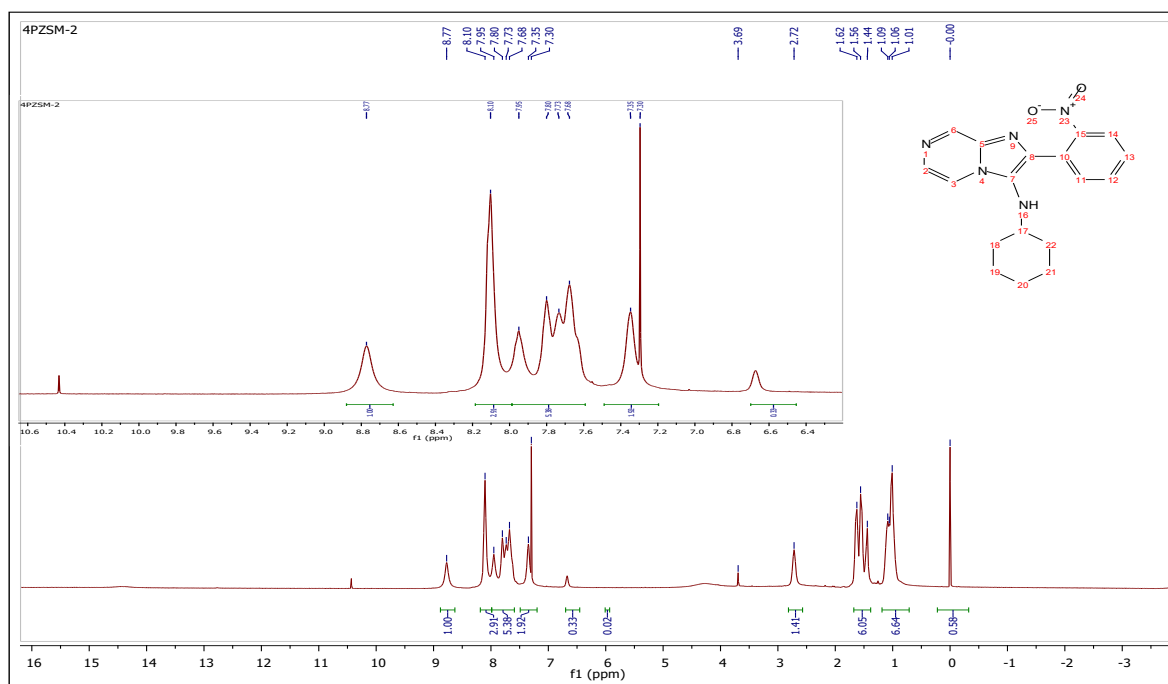

**Supplementary Fig. 23 400 MHz (CDCl<sub>3</sub>) <sup>1</sup>H NMR spectrum of N-cyclohexyl-2-(2-nitrophenyl)imidazo[1,2-a]pyrazin-3-amine (10).**

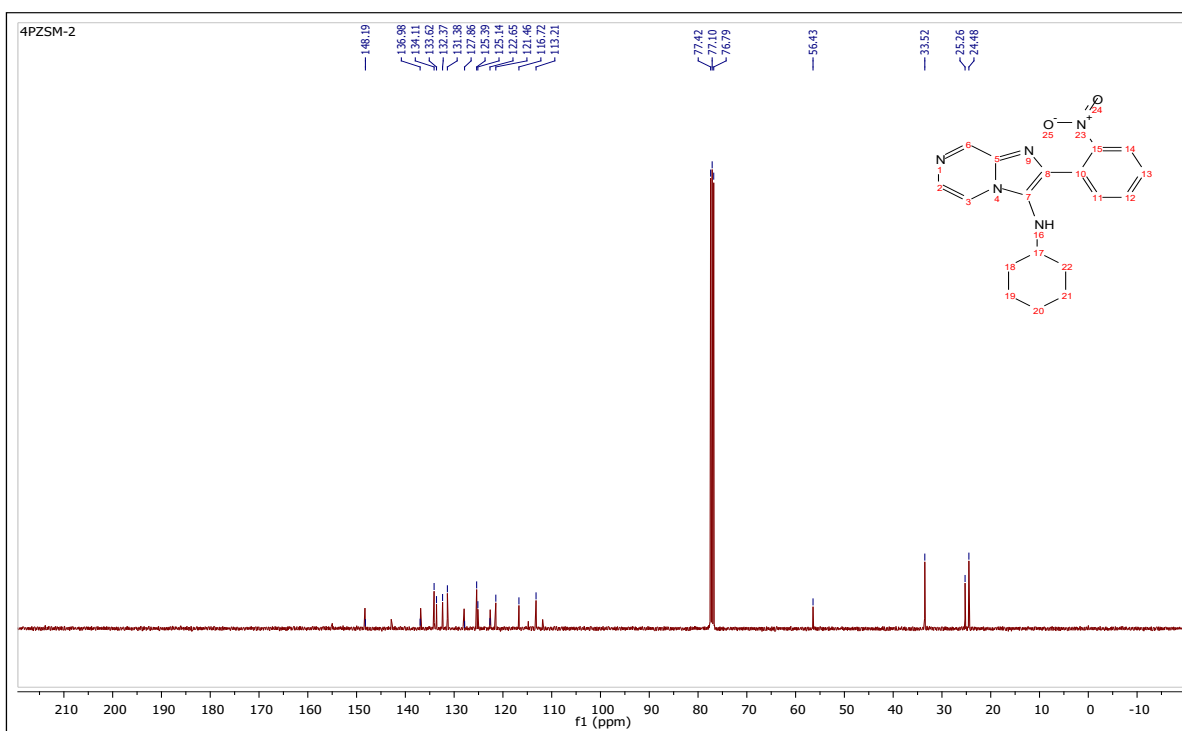

**Supplementary Fig. 24 100 MHz (CDCl<sub>3</sub>) <sup>13</sup>C NMR spectrum of N-cyclohexyl-2-(2-nitrophenyl)imidazo[1,2-a]pyrazin-3-amine (10).**

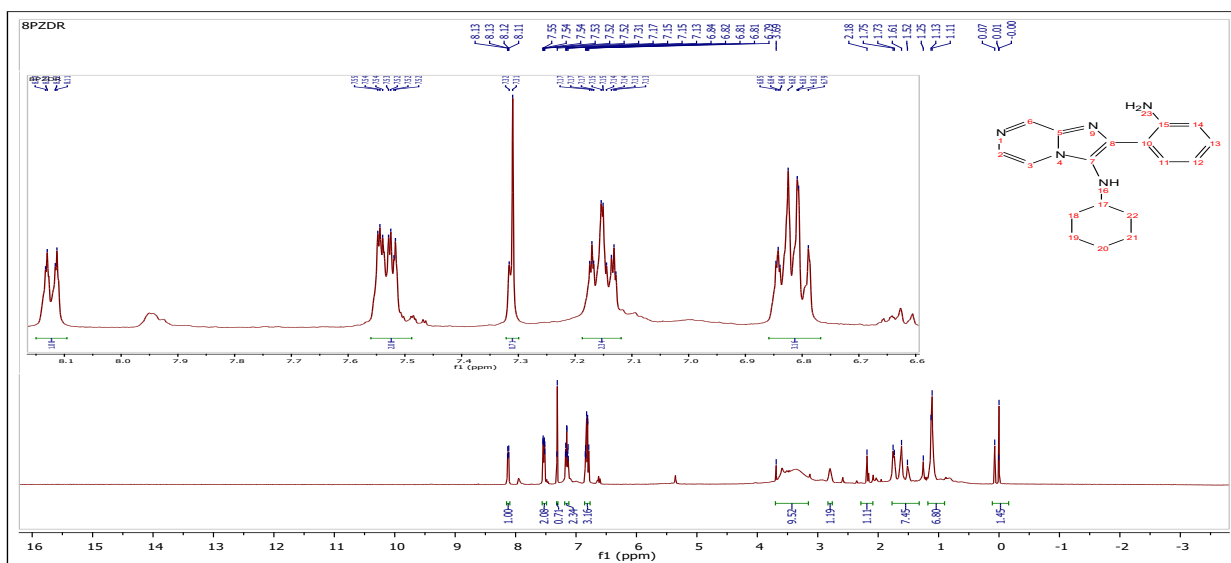

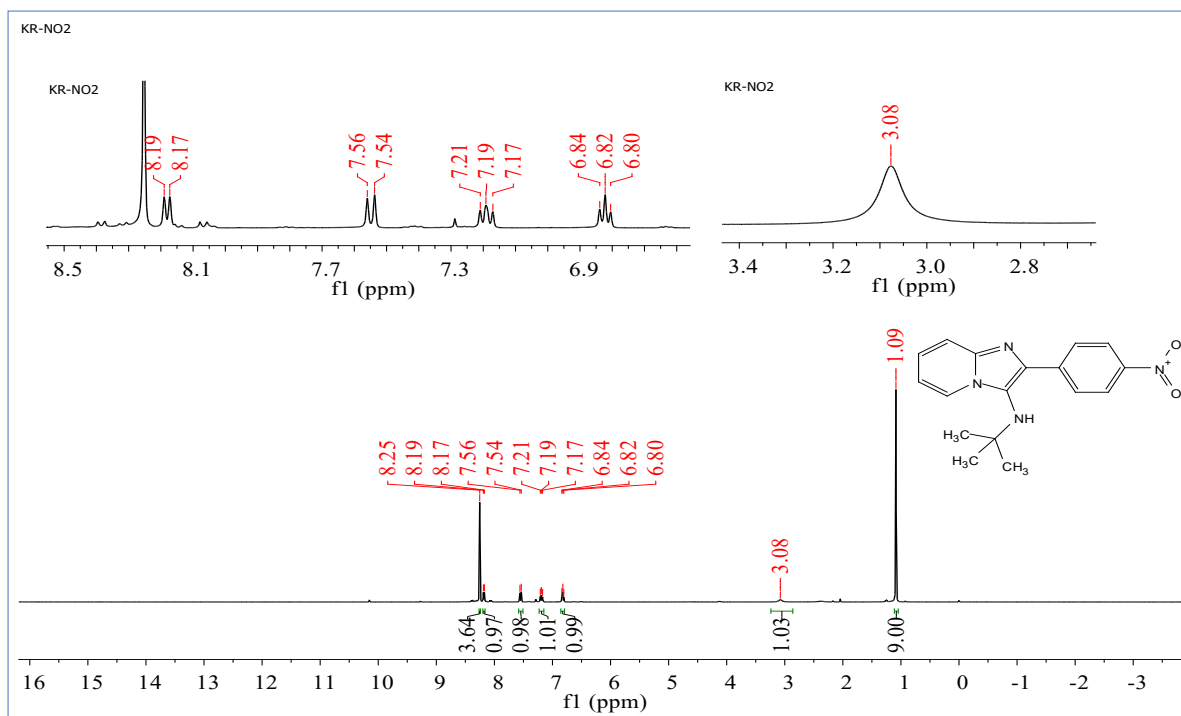

**Supplementary Fig. 27** 400 MHz (CDCl<sub>3</sub>) <sup>1</sup>H NMR spectrum of N-(tert-butyl)-2-(4-nitrophenyl)imidazo[1,2-a]pyridin-3-amine (12a).

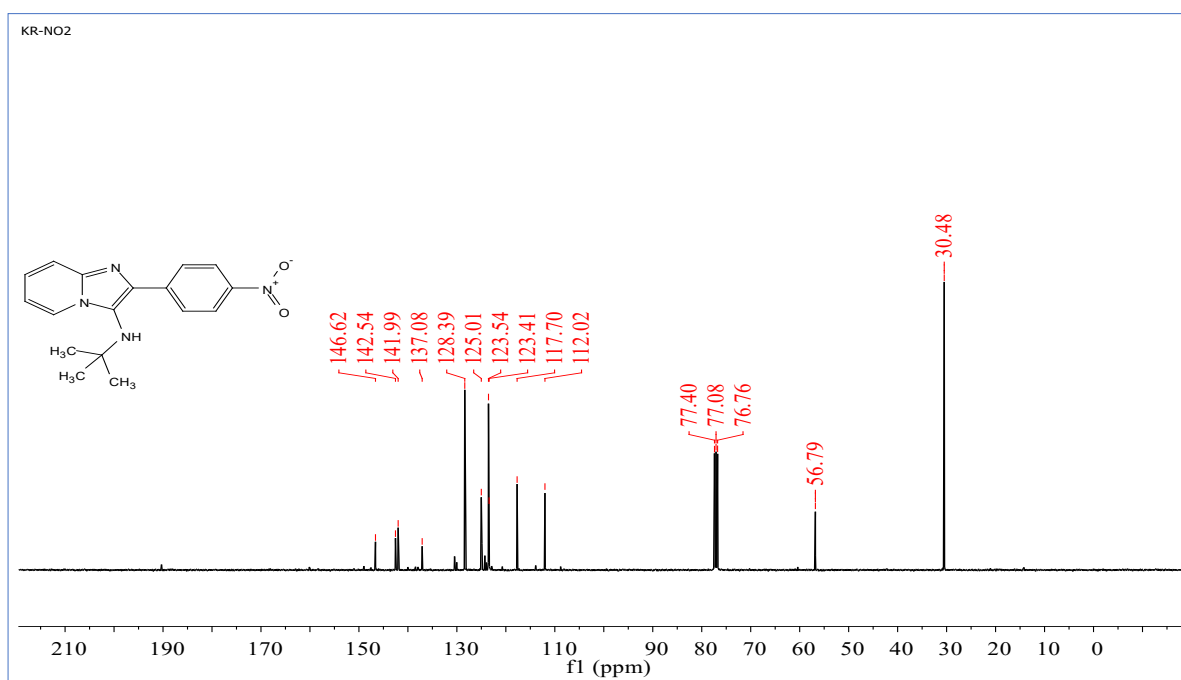

**Supplementary Fig. 28** 100 MHz (CDCl<sub>3</sub>) <sup>13</sup>C NMR spectrum of N-(tert-butyl)-2-(4-nitrophenyl)imidazo[1,2-a]pyridin-3-amine (12a).

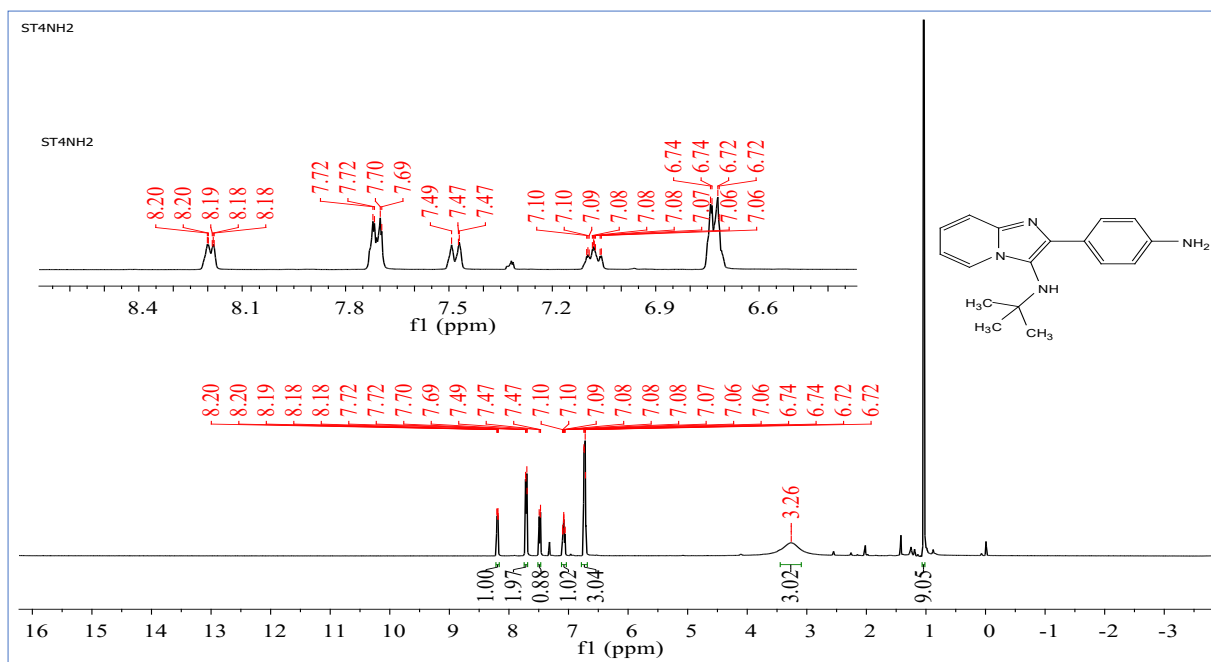

Supplementary Fig. 29 400 MHz (DMSO-d<sub>6</sub>) <sup>1</sup>H NMR spectrum of 2-(4-aminophenyl)-N-(tert-butyl)imidazo[1,2-a]pyridin-3-amine (12b).

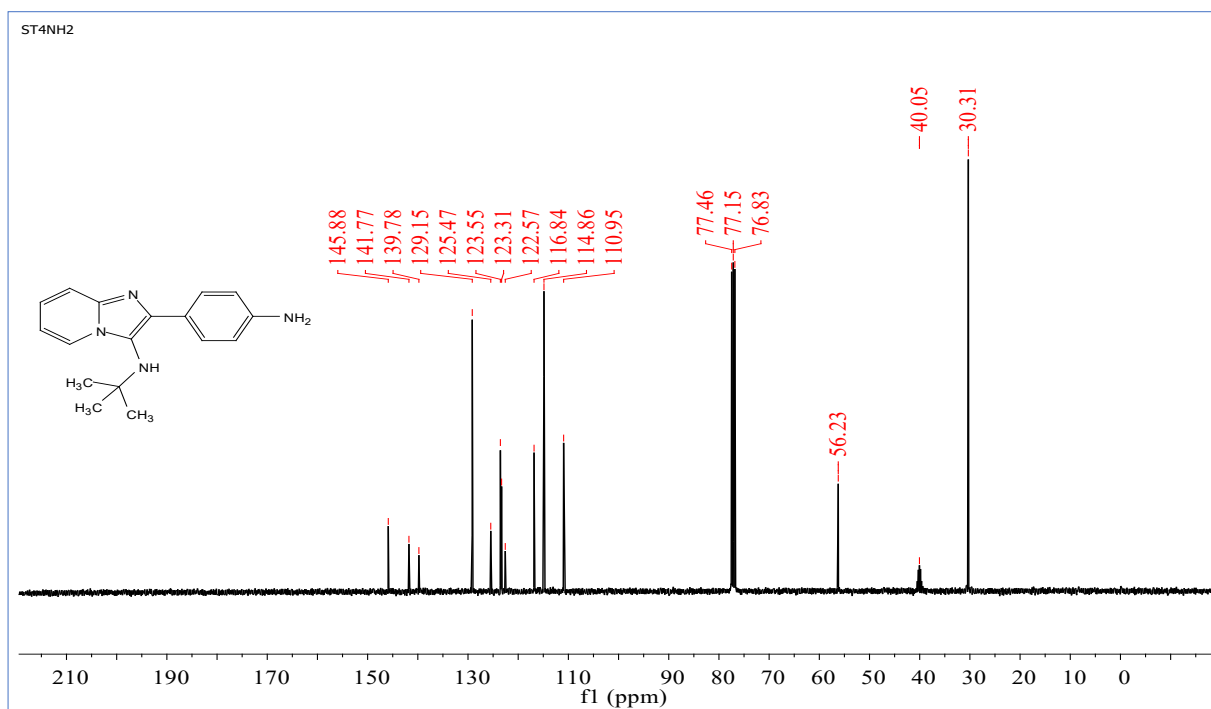

Supplementary Fig. 30 100 MHz (DMSO-d<sub>6</sub>) <sup>13</sup>C NMR spectrum of 2-(4-aminophenyl)-N-(tert-butyl)imidazo[1,2-a]pyridin-3-amine (12b).



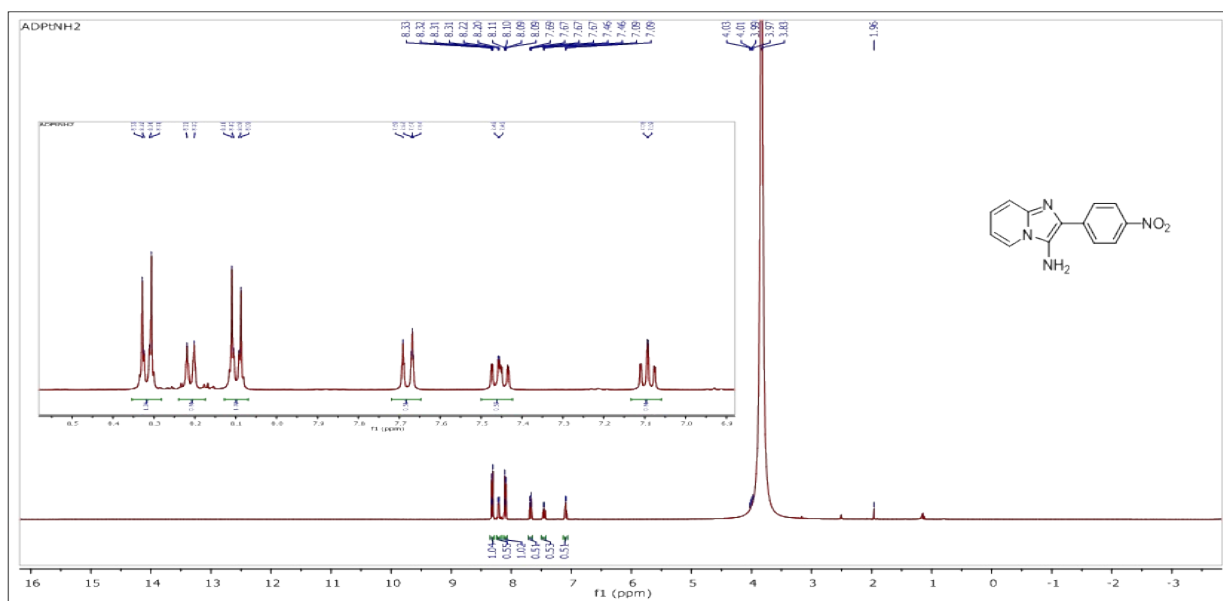

Supplementary Fig. 31 400 MHz (DMSO-d<sub>6</sub>) <sup>1</sup>H NMR spectrum of 2-(4-nitrophenyl)imidazo[1,2-a]pyridin-3-amine (12c).

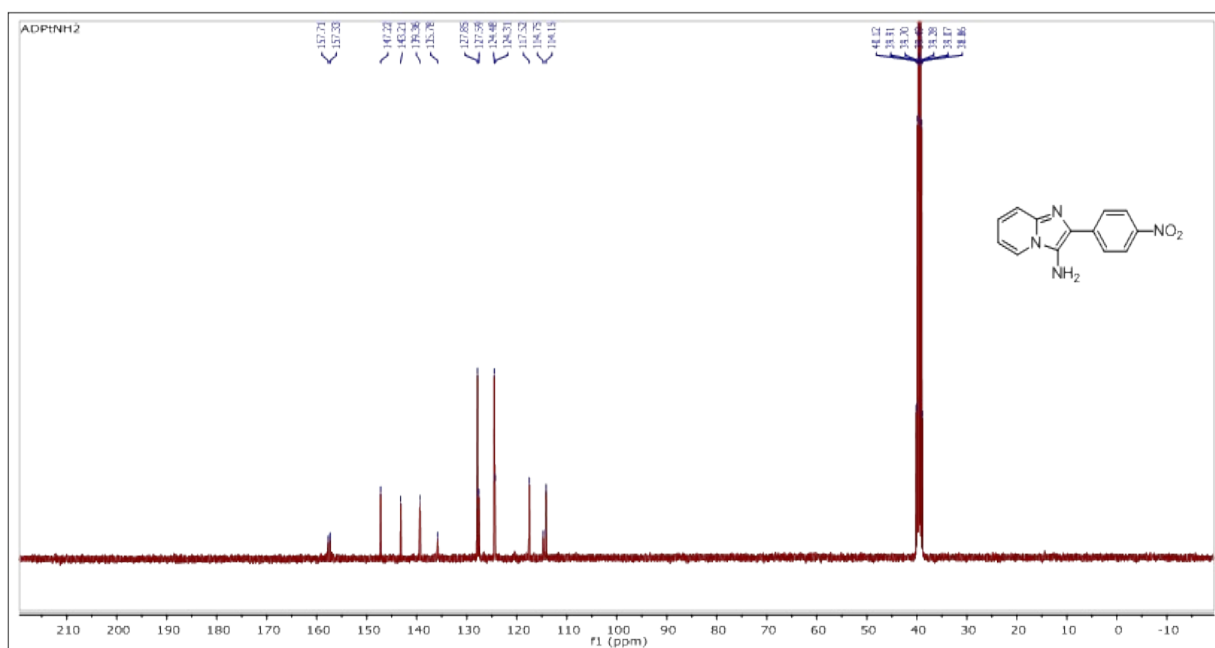

Supplementary Fig. 32 100 MHz (DMSO-d<sub>6</sub>) <sup>13</sup>C NMR spectrum of 2-(4-nitrophenyl)imidazo[1,2-a]pyridin-3-amine (12c).

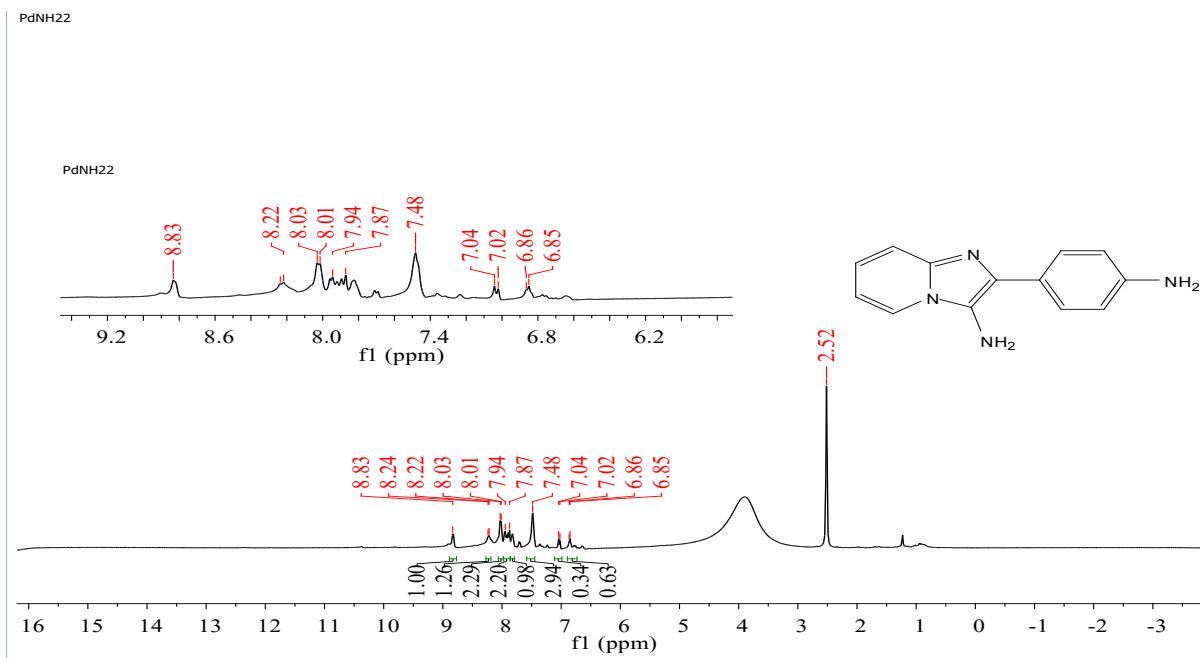

**Supplementary Fig. 33** 400 MHz (DMSO-d<sub>6</sub>) <sup>1</sup>H NMR spectrum of 2-(4-aminophenyl)imidazo[1,2-a]pyridin-3-amine (12d).

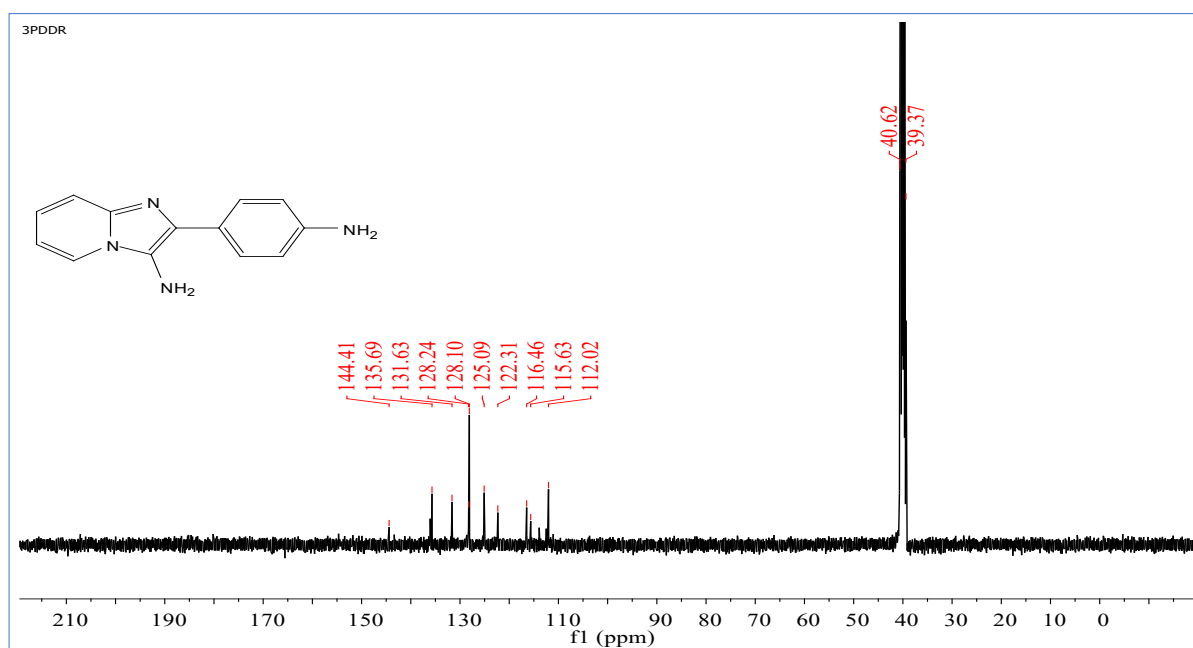

**Supplementary Fig. 34** 100 MHz (DMSO-d<sub>6</sub>) <sup>13</sup>C NMR spectrum of 2-(4-aminophenyl)imidazo[1,2-a]pyridin-3-amine (12d).

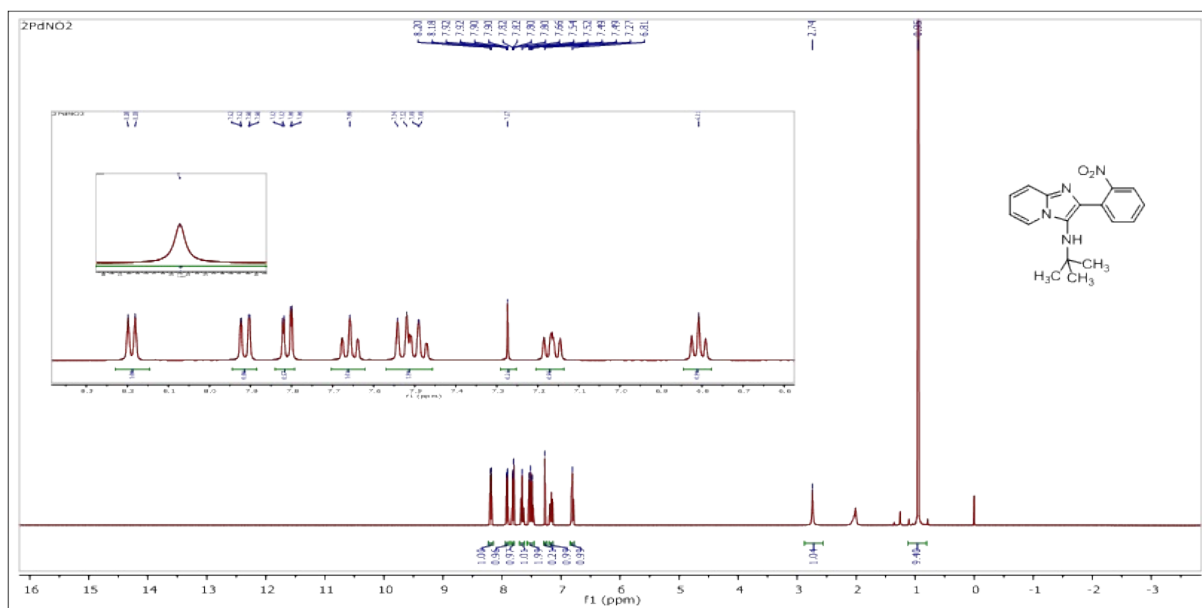

**Supplementary Fig. 35** 400 MHz (CDCl<sub>3</sub>) <sup>1</sup>H NMR spectrum of N-(tert-butyl)-2-(2-nitrophenyl)imidazo[1,2-a]pyridin-3-amine (12e).

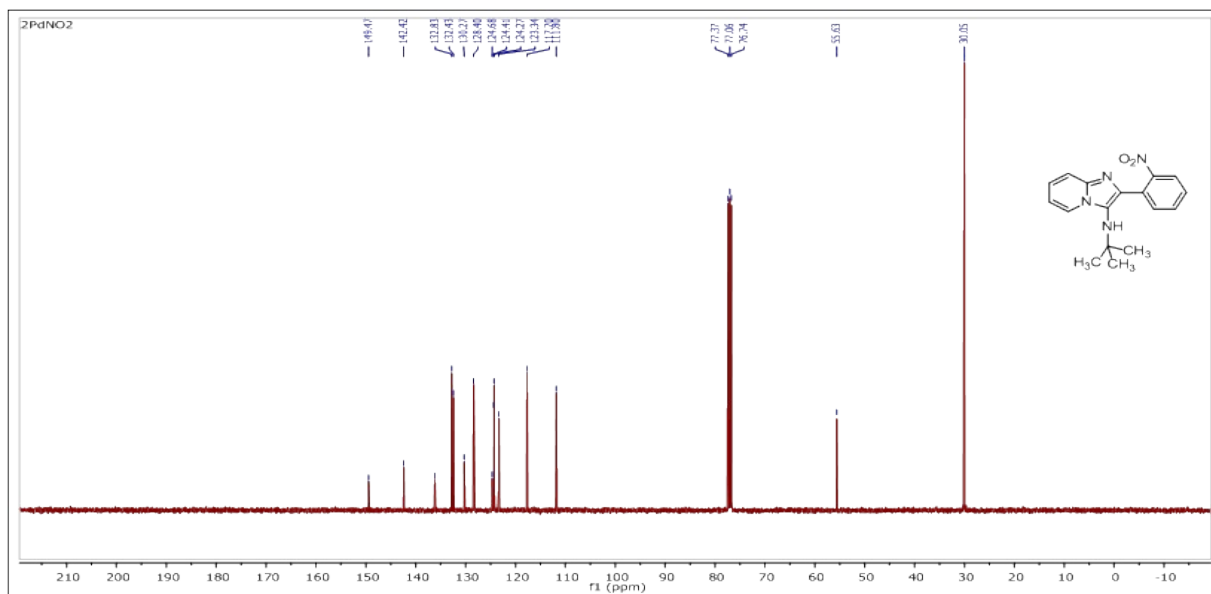

**Supplementary Fig. 36** 100 MHz (CDCl<sub>3</sub>) <sup>13</sup>C NMR spectrum of N-(tert-butyl)-2-(2-nitrophenyl)imidazo[1,2-a]pyridin-3-amine (12e).

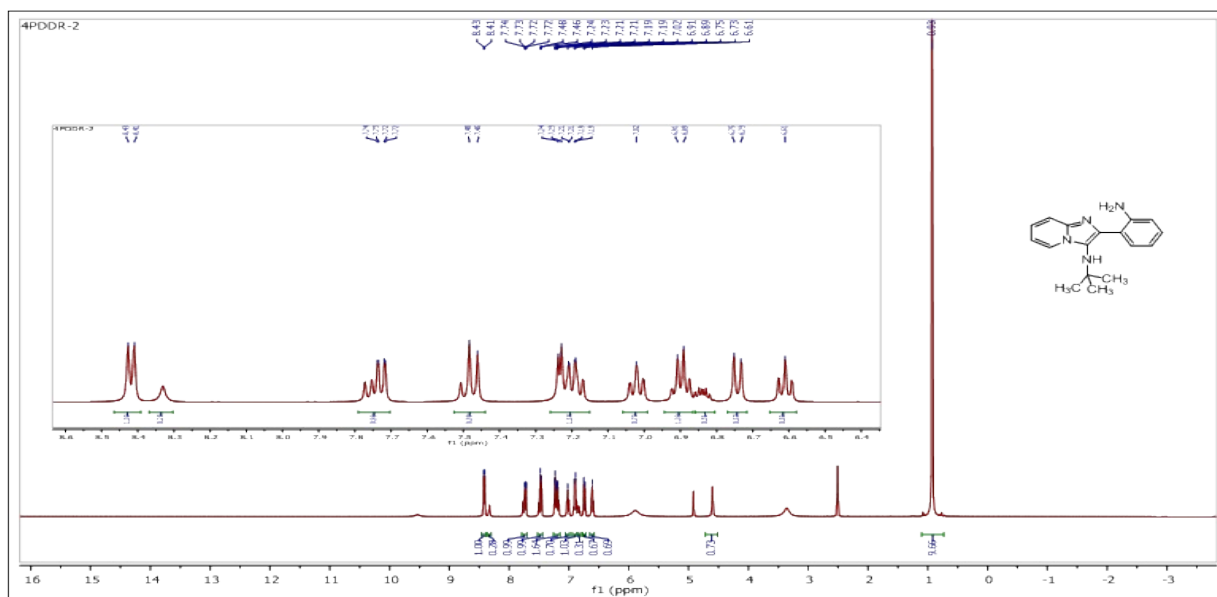

**Supplementary Fig. 37 400 MHz (DMSO-d<sub>6</sub>) <sup>1</sup>H NMR spectrum of 2-(2-aminophenyl)-N-(tert-butyl)imidazo[1,2-a]pyridin-3-amine (12f).**

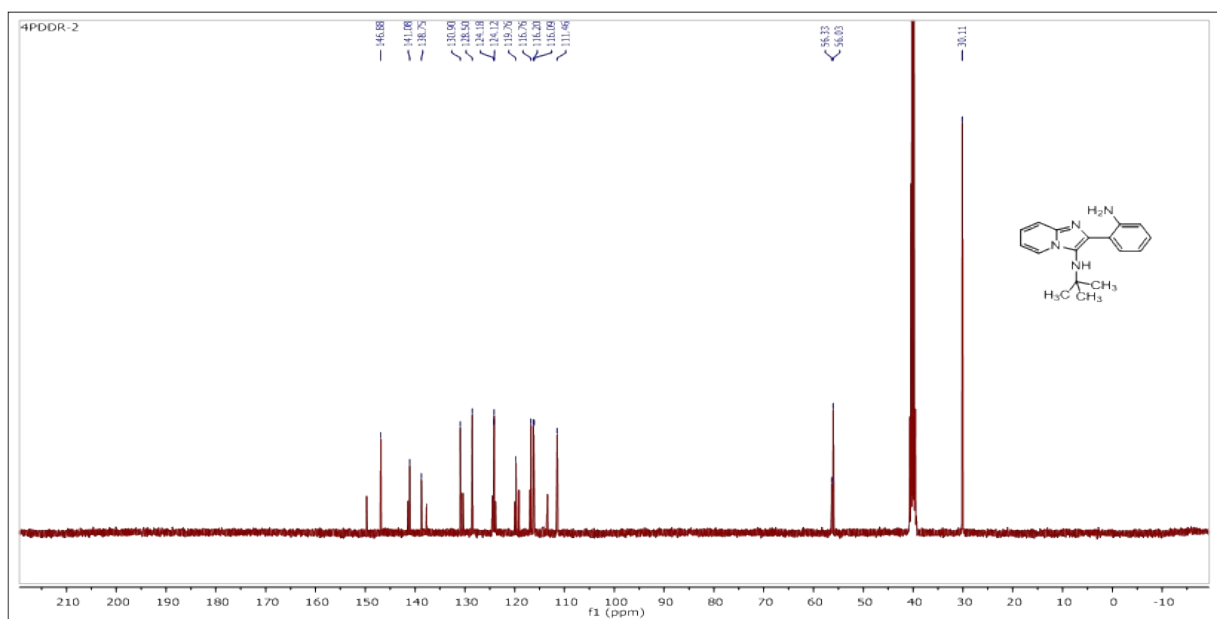

**Supplementary Fig. 38 100 MHz (DMSO-d<sub>6</sub>) <sup>13</sup>C NMR spectrum of 2-(2-aminophenyl)-N-(tert-butyl)imidazo[1,2-a]pyridin-3-amine (12f).**

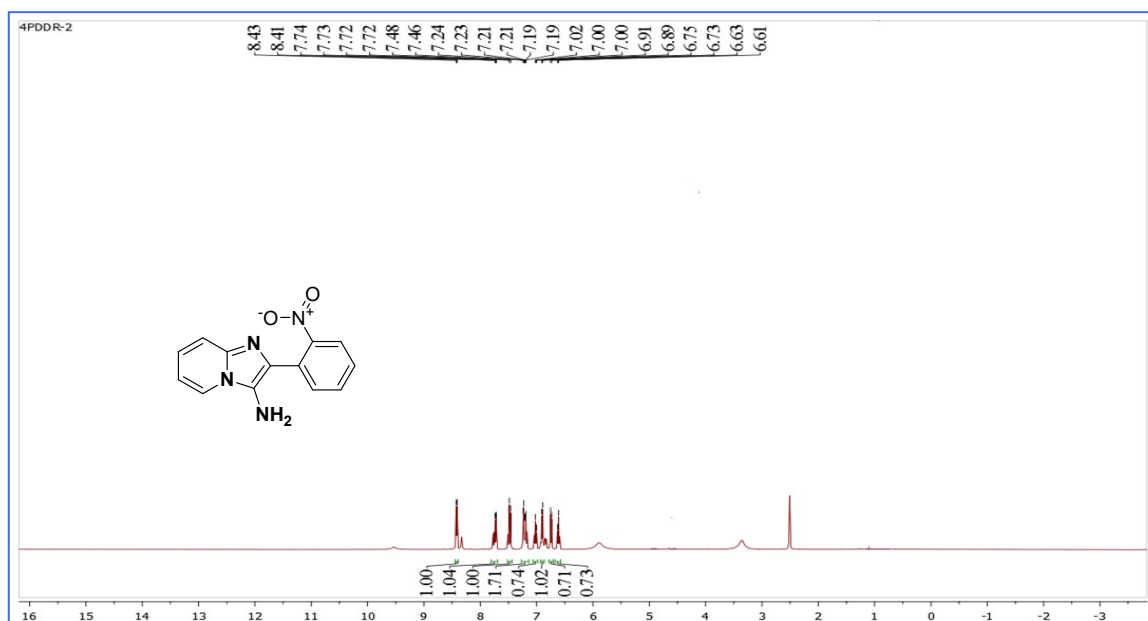

**Supplementary Fig. 39** 400 MHz (DMSO-d<sub>6</sub>) <sup>1</sup>H NMR spectrum of 2-(2-nitrophenyl)imidazo[1,2-a]pyridin-3-amine (12g).

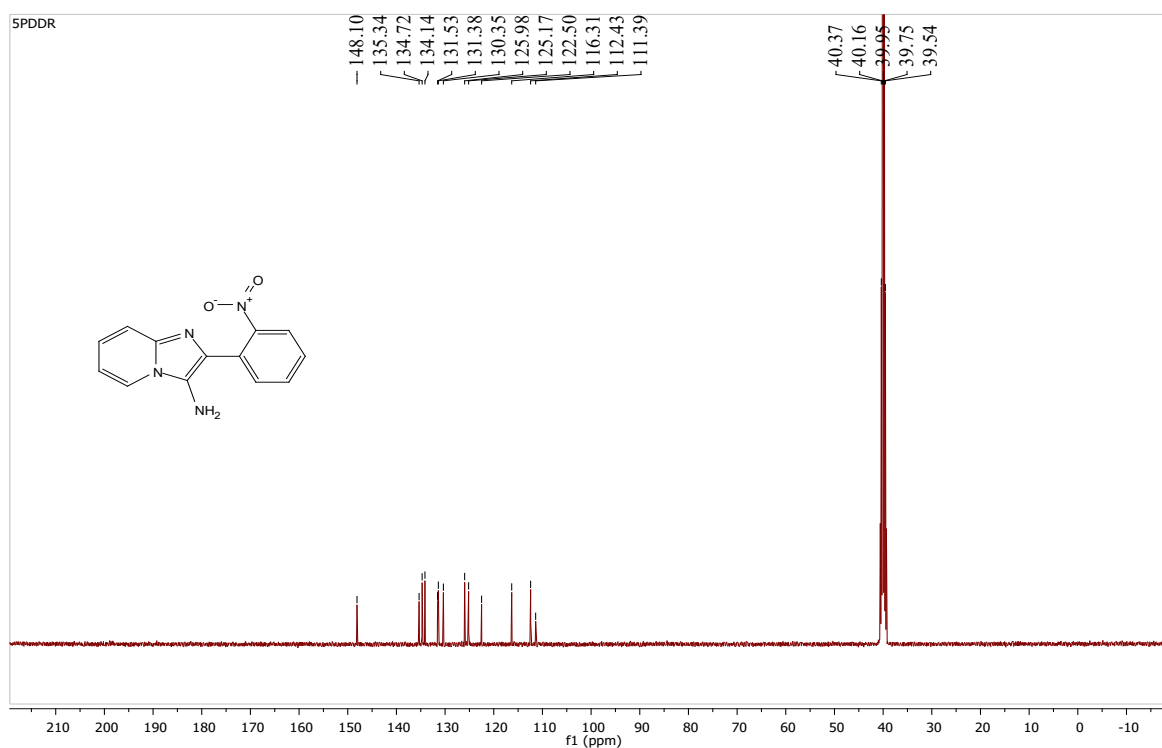

**Supplementary Fig. 40** 100 MHz (DMSO-d<sub>6</sub>) <sup>13</sup>C NMR spectrum of 2-(2-nitrophenyl)imidazo[1,2-a]pyridin-3-amine (12g).

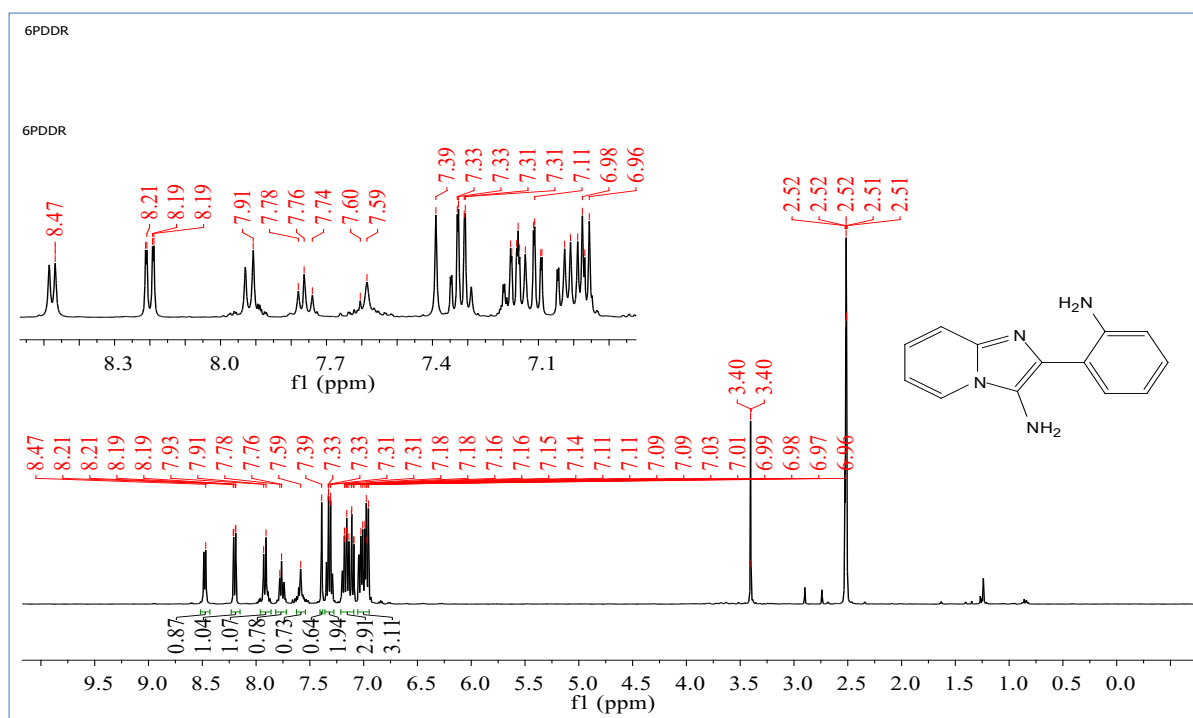

Supplementary Fig. 41 400 MHz (DMSO-d<sub>6</sub>) <sup>1</sup>H NMR spectrum of 2-(2-aminophenyl)imidazo[1,2-a]pyridin-3-amine (12h).

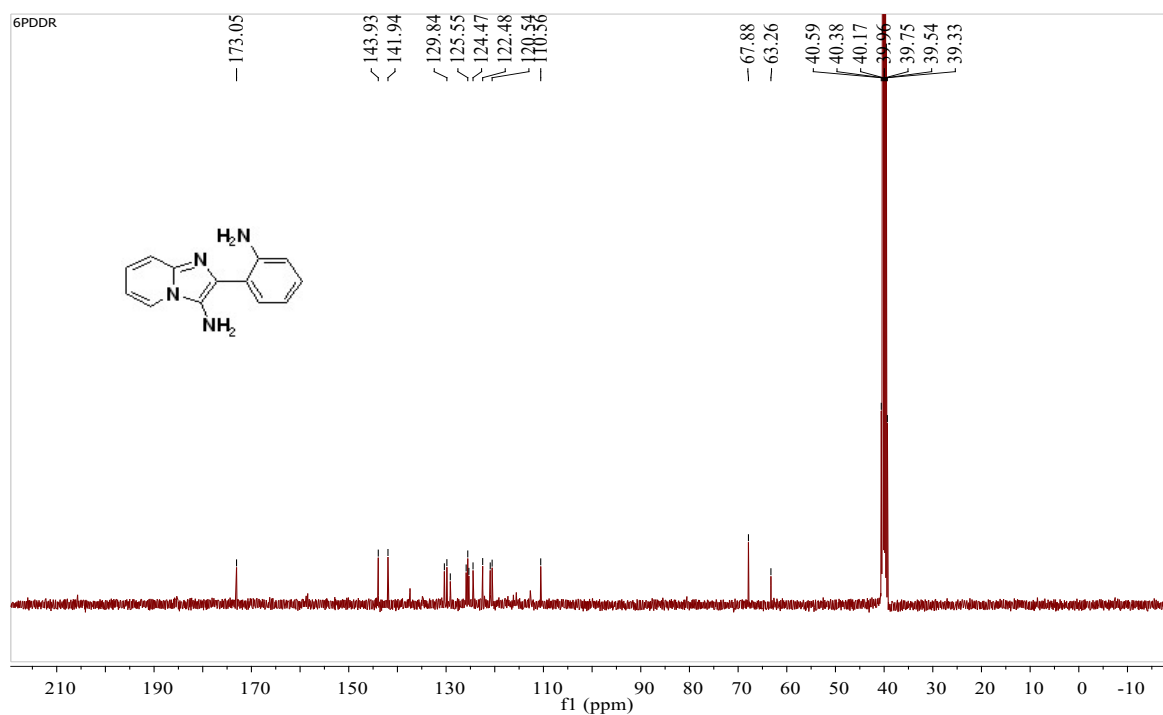

Supplementary Fig. 42 100 MHz (DMSO-d<sub>6</sub>) <sup>13</sup>C NMR spectrum of 2-(2-aminophenyl)imidazo[1,2-a]pyridin-3-amine (12h).

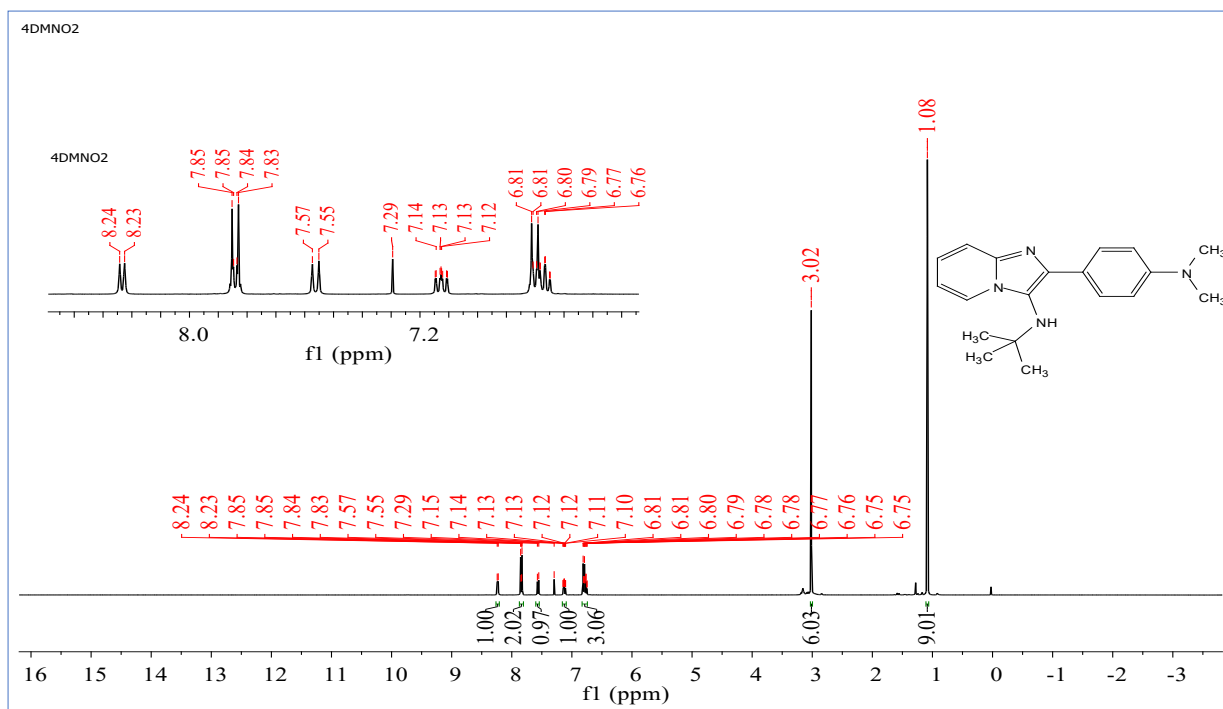

**Supplementary Fig. 43 400 MHz (CDCl<sub>3</sub>) <sup>1</sup>H NMR spectrum of N-(tert-butyl)-2-(4-(dimethylamino)phenyl)imidazo[1,2-a]pyridin-3-amine (12i)**

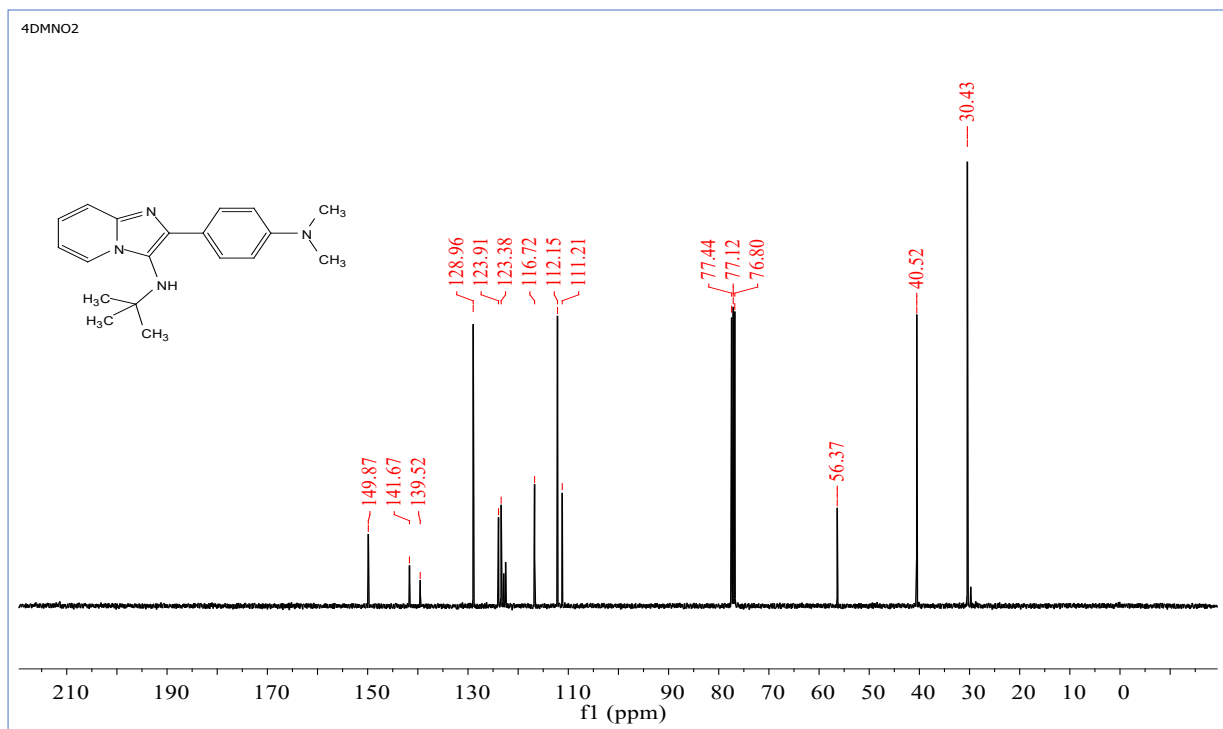

**Supplementary Fig. 44 100 MHz (CDCl<sub>3</sub>) <sup>13</sup>C NMR spectrum of N-(tert-butyl)-2-(4-(dimethylamino)phenyl)imidazo[1,2-a]pyridin-3-amine (12i)**

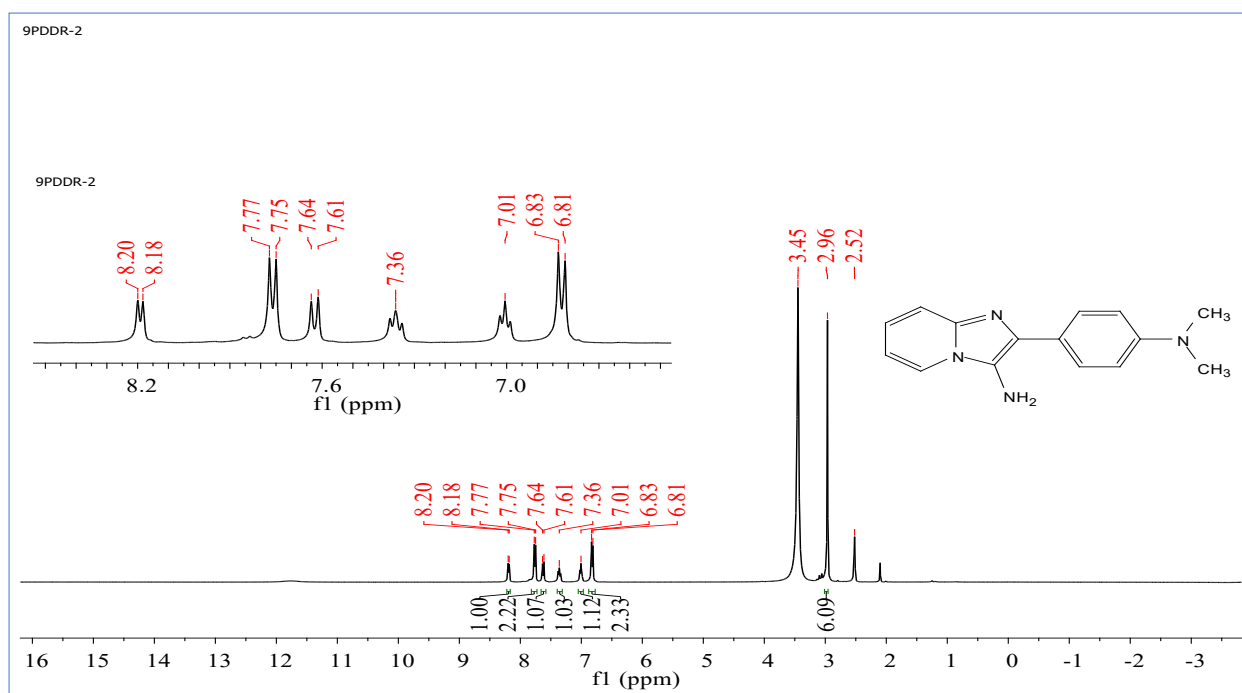

Supplementary Fig. 45 400 MHz (DMSO-d<sub>6</sub>) <sup>1</sup>H NMR spectrum of 2-(4-(dimethylamino)phenyl)imidazo[1,2-a]pyridin-3-amine (12j).

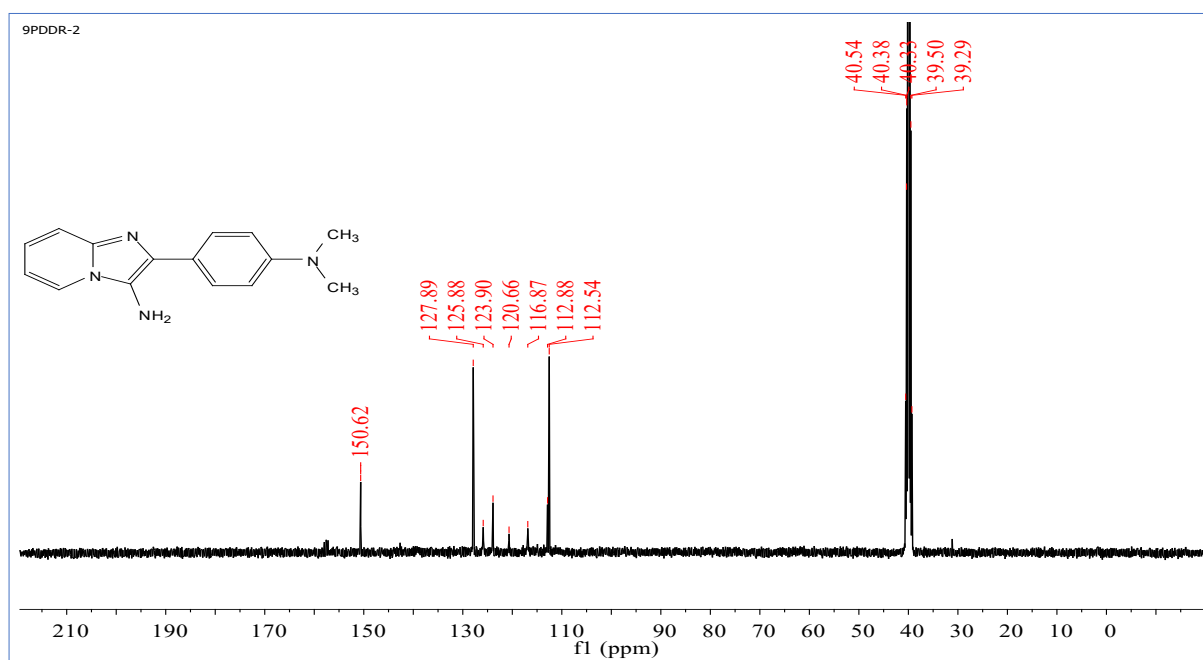

Supplementary Fig. 46 100 MHz (DMSO-d<sub>6</sub>) <sup>13</sup>C NMR spectrum of 2-(4-(dimethylamino)phenyl)imidazo[1,2-a]pyridin-3-amine (12j).





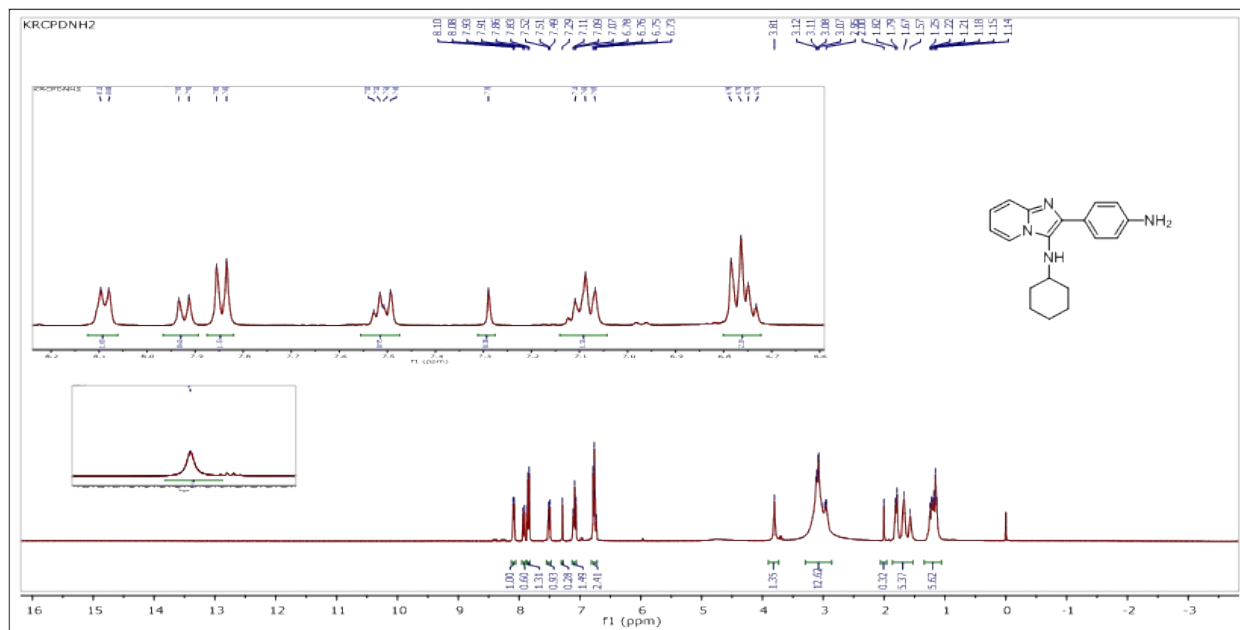

Supplementary Fig. 49 400 MHz (CDCl<sub>3</sub>) <sup>1</sup>H NMR spectrum of 2-(4-aminophenyl)-N-cyclohexylimidazo[1,2-a]pyridin-3-amine (12).

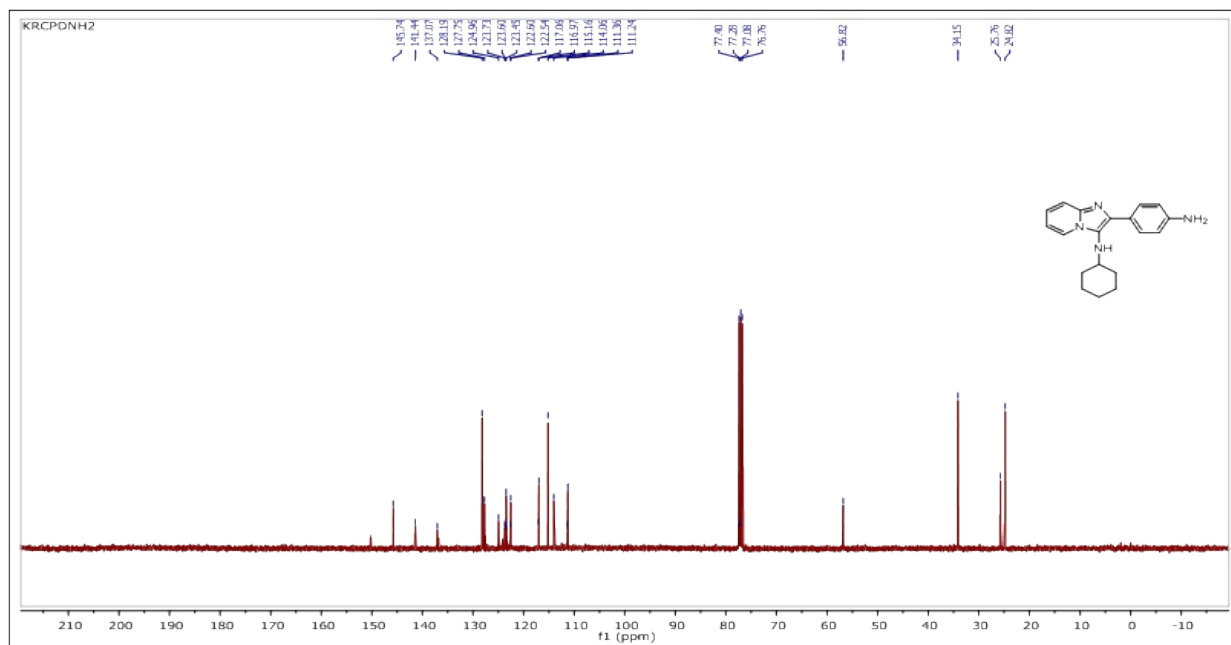

Supplementary Fig. 50 100 MHz (CDCl<sub>3</sub>) <sup>13</sup>C NMR spectrum of 2-(4-aminophenyl)-N-cyclohexylimidazo[1,2-a]pyridin-3-amine (12).

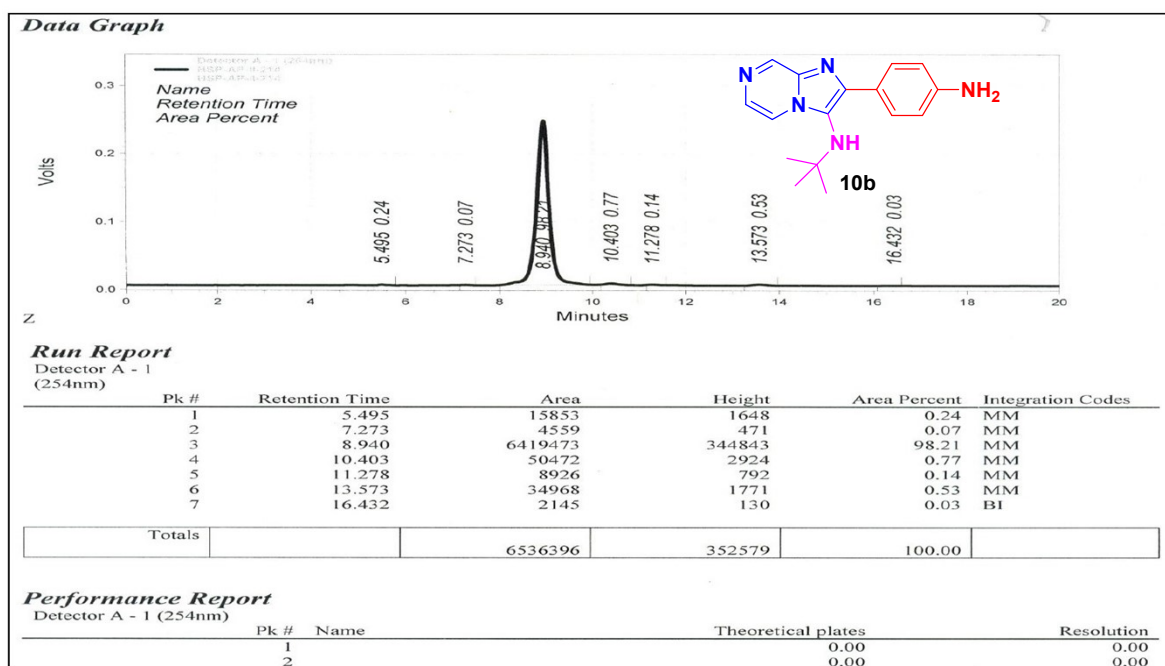

Supplementary Fig. 51 HPLC profile of 2-(4-aminophenyl)-N-(tert-butyl)imidazo[1,2-a]pyrazin-3-amine (10b).

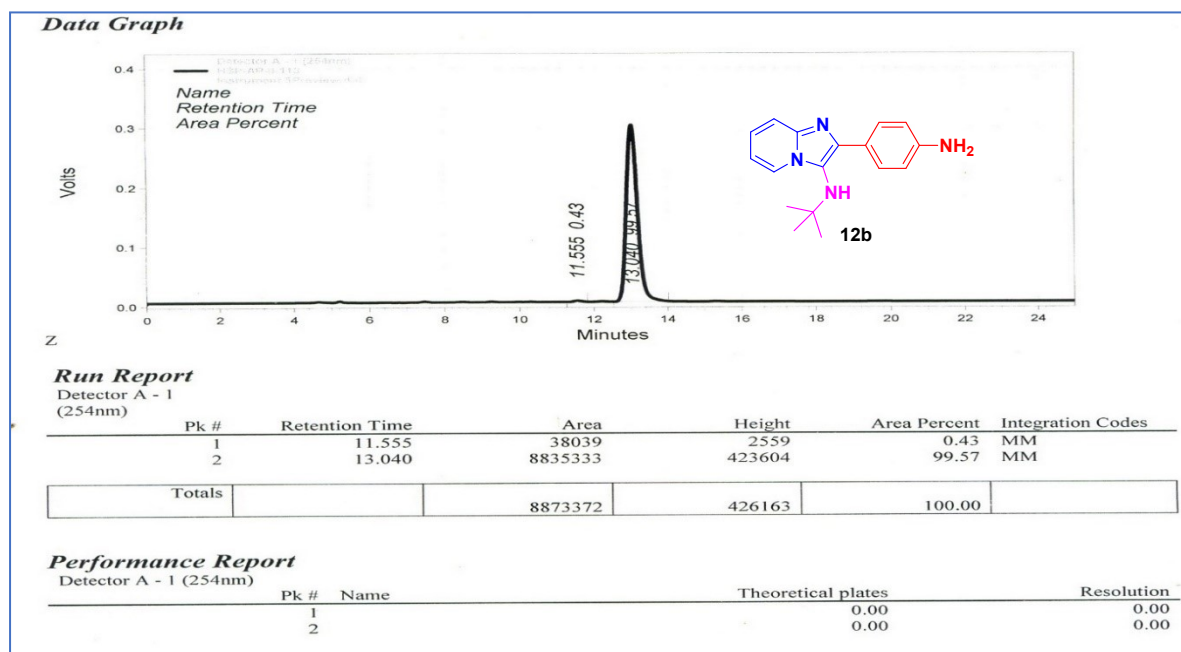

Supplementary Fig. 52 HPLC profile of 2-(4-aminophenyl)-N-(tert-butyl)imidazo[1,2-a]pyridin-3-amine (12b).
